# Supplementary material
Source: PubMed Central journal article supplement (PMC7323787)
Supplement: NIHMS1595548-supplement-Supplemental_Figures.pdf [file NIHMS1595548-supplement-Supplemental_Figures.pdf]

**Supplemental Figure S1: Total ion chromatogram (TIC), extracted ion chromatogram (EIC) and comparative MS data of Figure 3 and Figure 4.**

**Panel 1:** TIC (A) and EIC of hapalindole product ( $m/z$  305) (B) and *cis*-indole isonitrile **2** ( $m/z$  169) (C) compared with the standard **2** (D) for the *in vitro* TT-assay performed in the absence of cyclase and FamD2 plasmids (for Figure 3 A). **Panel 2:** MS data of the product (top) and the standard **2** (bottom) are shown.

**Panel 1**

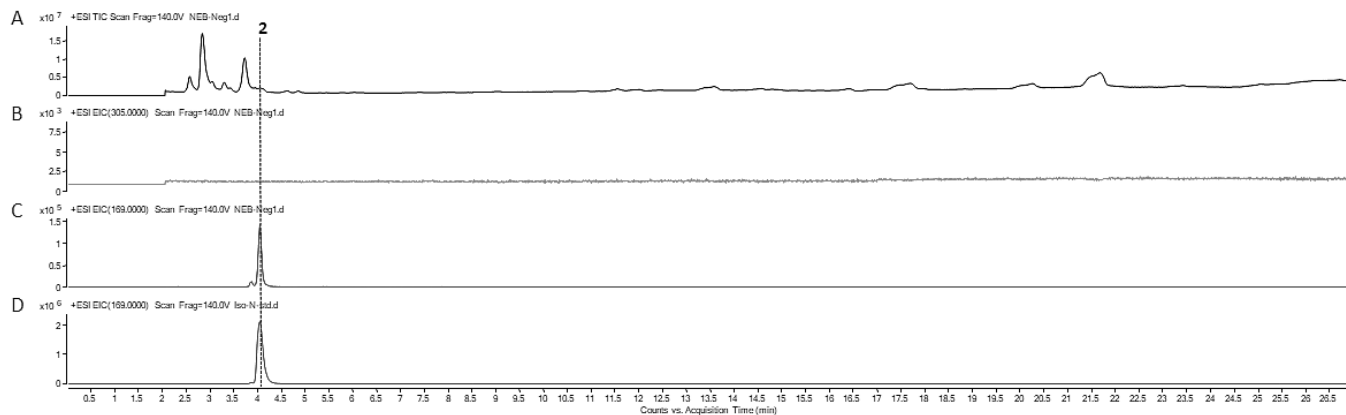

**Panel 2**

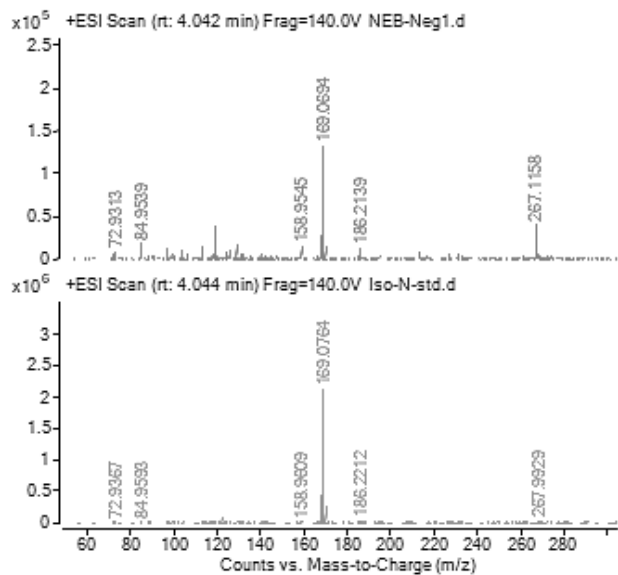

B. **Panel 1:** TIC (A) and EIC of *cis*-indole isonitrile **2** ( $m/z$  169) (B) and *cis*-indole isonitrile-GPP intermediate **3** ( $m/z$  305) (C) compared with the standard **3** (D) for the *in vitro* TT-assay performed in the presence of FamD2 plasmid alone (for Figure 3 B). **Panel 2:** MS data of the product (top) and the standard **3** (bottom) are shown.

### Panel 1

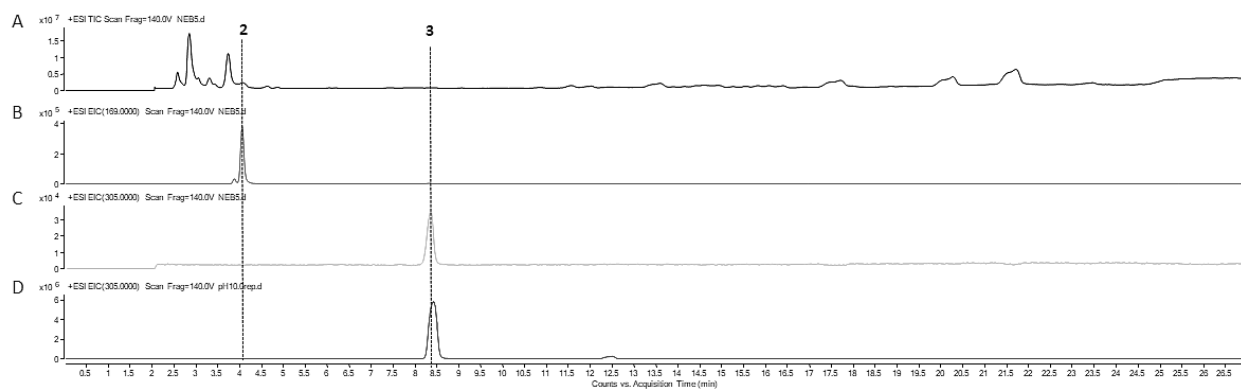

### Panel 2

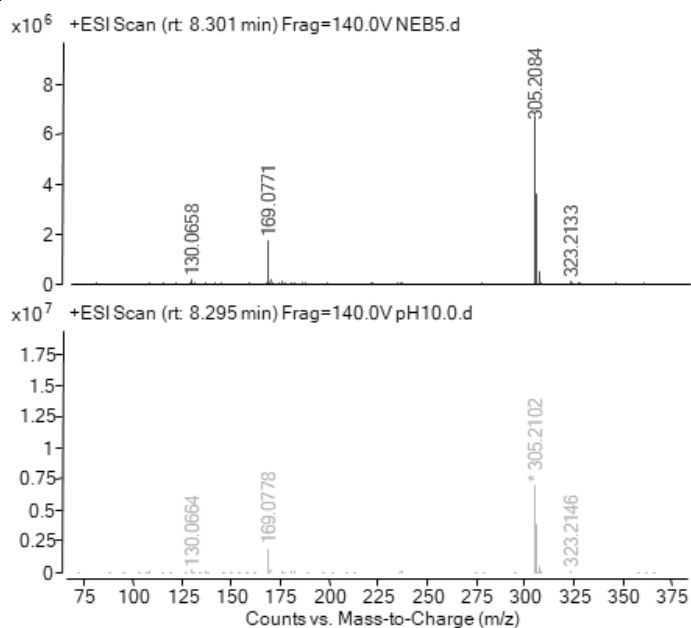

C. **Panel 1:** TIC (A) and EIC of *cis*-indole isonitrile **2** ( $m/z$  169) (B), *cis*-indole isonitrile-GPP intermediate **3** ( $m/z$  305) (C) and 12-*epi*-hupalindole U **4** ( $m/z$  305) (D) compared with the standard **4** (E) for the *in vitro* TT-assay performed in the presence of FamD2 and FamC1 plasmids (for Figure 3 C). **Panel 2:** MS data of the product (top) and the standard **4** (bottom) are shown.

**Panel 1**

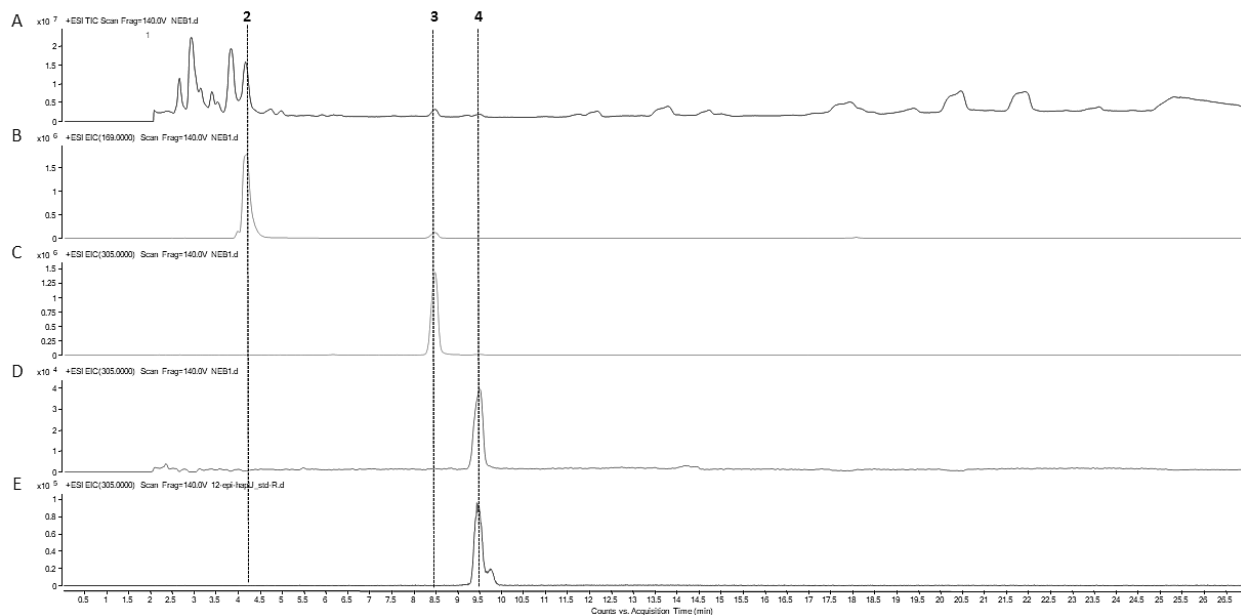

**Panel 2**

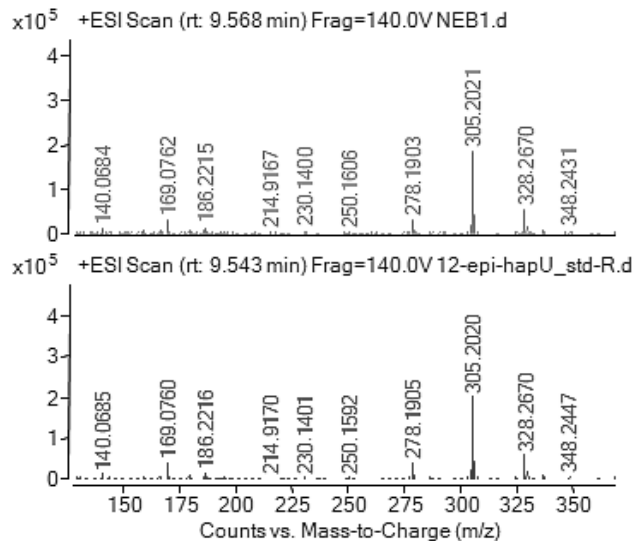

D. **Panel 1:** TIC (A) and EIC of *cis*-indole isonitrile **2** ( $m/z$  169) (B), *cis*-indole isonitrile-GPP intermediate **3** ( $m/z$  305) and hapalindole H **6** ( $m/z$  305) product (C) were compared with the standard **6** (D) for the *in vitro* TT-assay performed in the presence of FamD2 and FamC2 plus FamC3 plasmids in the presence of lower 5 mM calcium (for Figure 3E). **Panel 2:** MS data of the product (top) and the standard **6** (bottom) are shown.

**Panel 1**

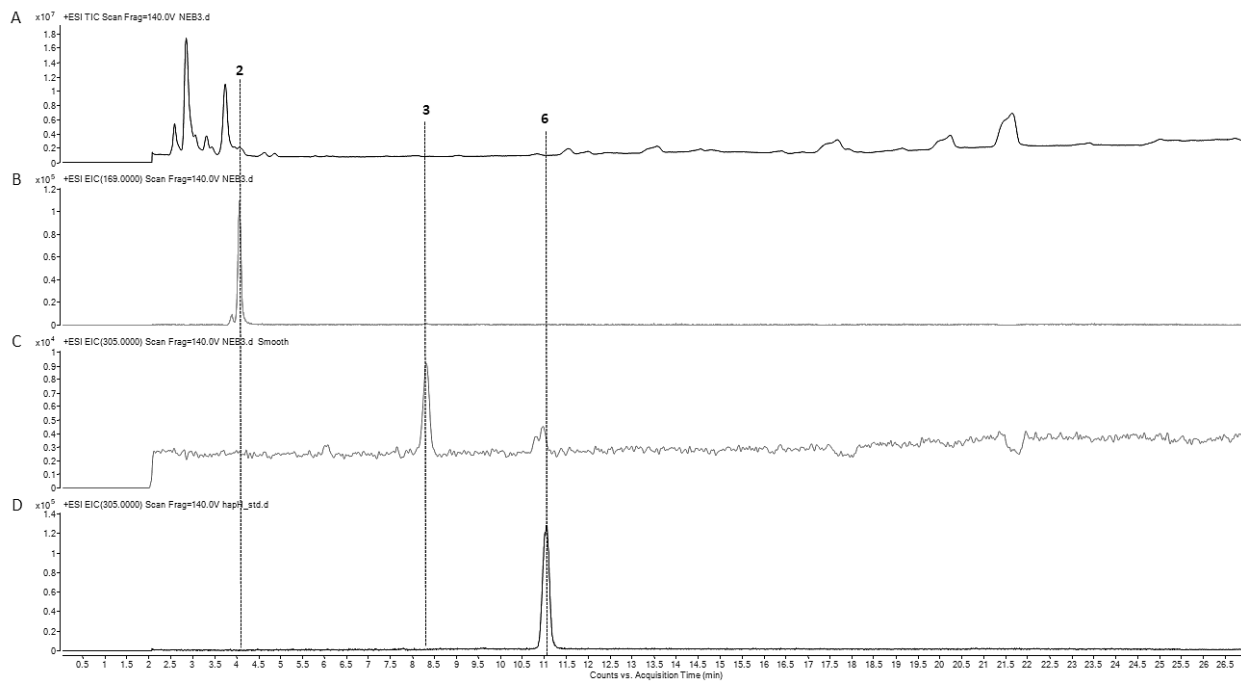

**Panel 2**

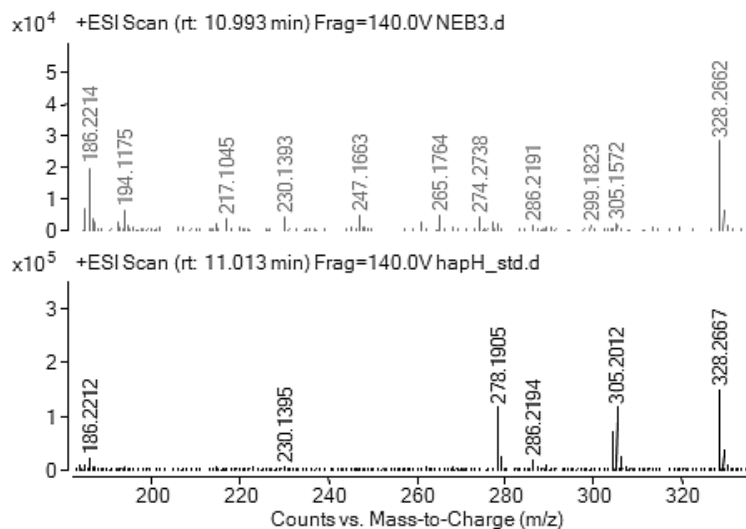

E. **Panel 1:** TIC (A) and EIC of *cis*-indole isonitrile **2** ( $m/z$  169) (B), and *cis*-indole isonitrile-GPP intermediate **3** ( $m/z$  305) and hapalindole H **6** ( $m/z$  305) (C) compared with the standard **6** (D) for the *in vitro* TT-assay performed in the presence of FamD2 and FamC2 plus FamC3 plasmids in the presence of higher 20 mM calcium (for Figure 3 E). **Panel 2:** MS data of the product (top) and the standard **6** (bottom) are shown.

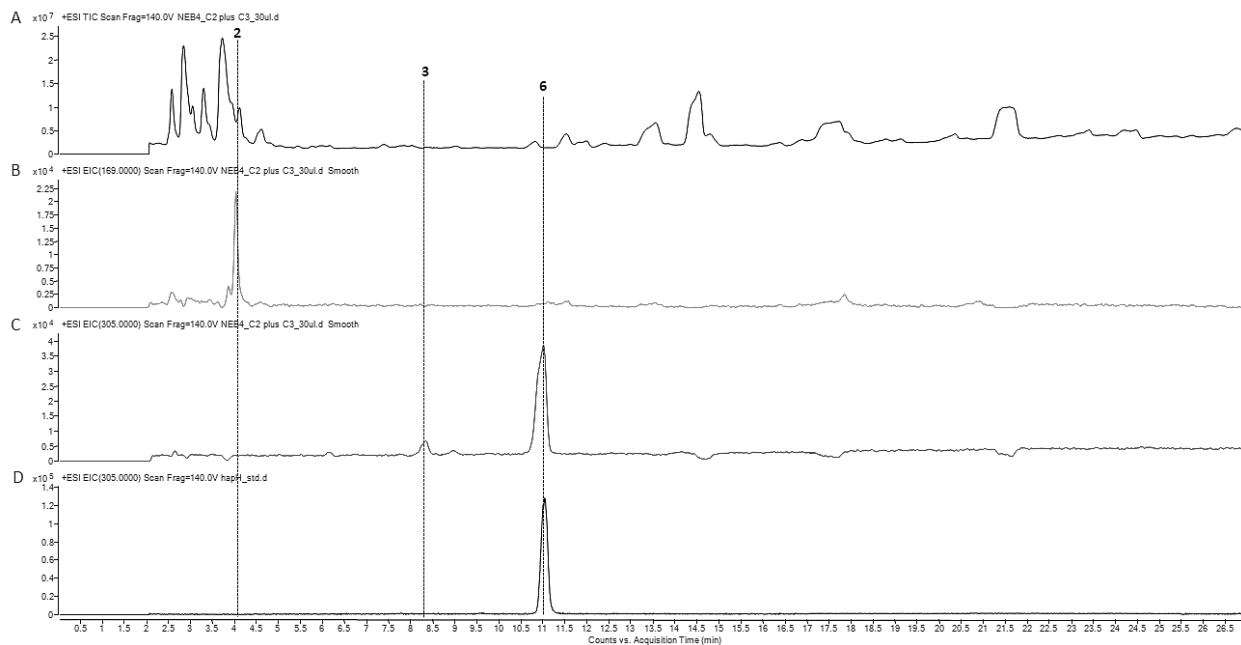

**Panel 2**

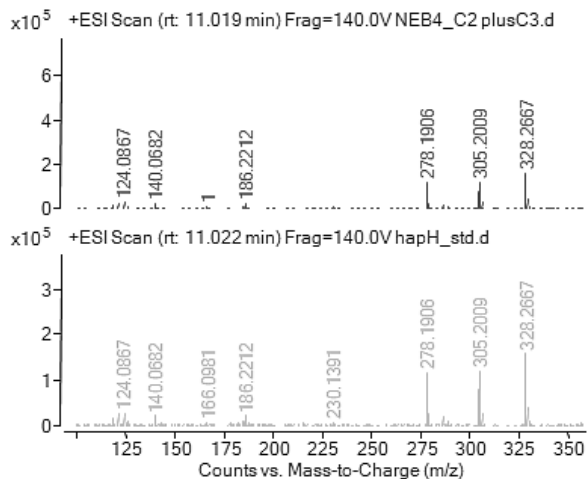

F. **Panel 1:** TIC (A) and EIC of *cis*-indole isonitrile **2** (*m/z* 169) (B) and hapalindole U **5** (*m/z* 305) (C) for the *in vitro* TT-assay performed in the presence of FamD2 and FamC1 plus FamC4 plasmids in the presence of lower 5 mM calcium concentration. Note that lower concentration of calcium did not show distinct product. **Panel 2:** TIC (A) and EIC of *cis*-indole isonitrile **2** (*m/z* 169) (B), and hapalindole U **5** and 12-*epi*-hapalindole U **4** (*m/z* 305) (C) compared with the standard **5** (D) and **4** (E) for the *in vitro* TT-assay performed in the presence of FamD2 and FamC2 plus FamC3 plasmids in the presence of higher 20 mM calcium concentration. **Panel 3:** MS data of the product (top) and the standard **5** (bottom) are shown.

### Panel 1

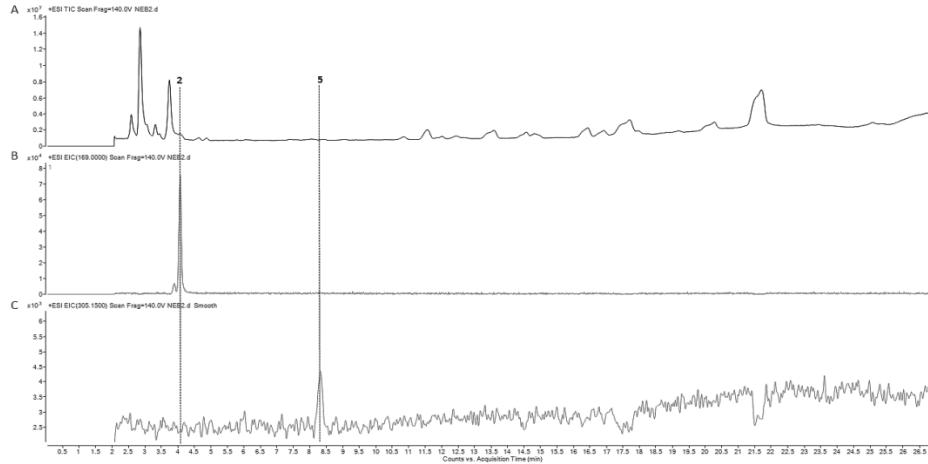

### Panel 2

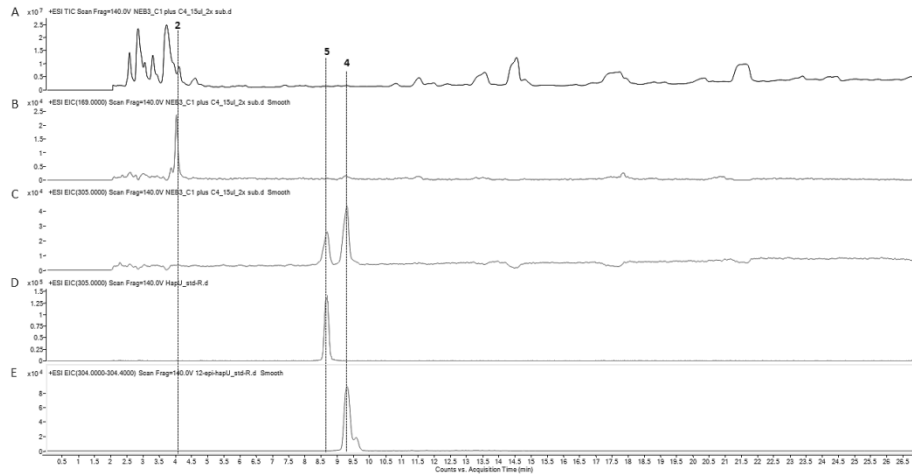

### Panel 3

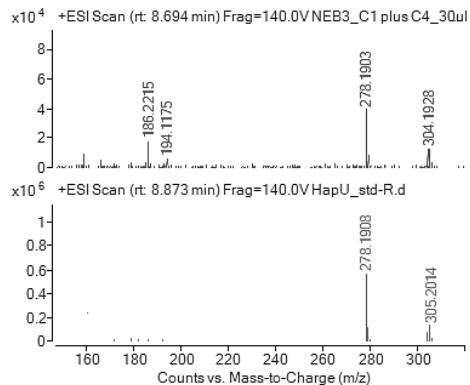

G. **Panel 1:** TIC (A) and EIC of *cis*-indole isonitrile **2** ( $m/z$  169) (B) and 12-*epi*-fischerindole U **7** ( $m/z$  305) (C) compared with the standard **7** (D) for the *in vitro* TT-assay performed in the presence of FamD2 and FisC plasmids (for Figure 4C). **Panel 2:** MS data of the product (top) and the standard **7** (bottom) are shown.

**Panel 1**

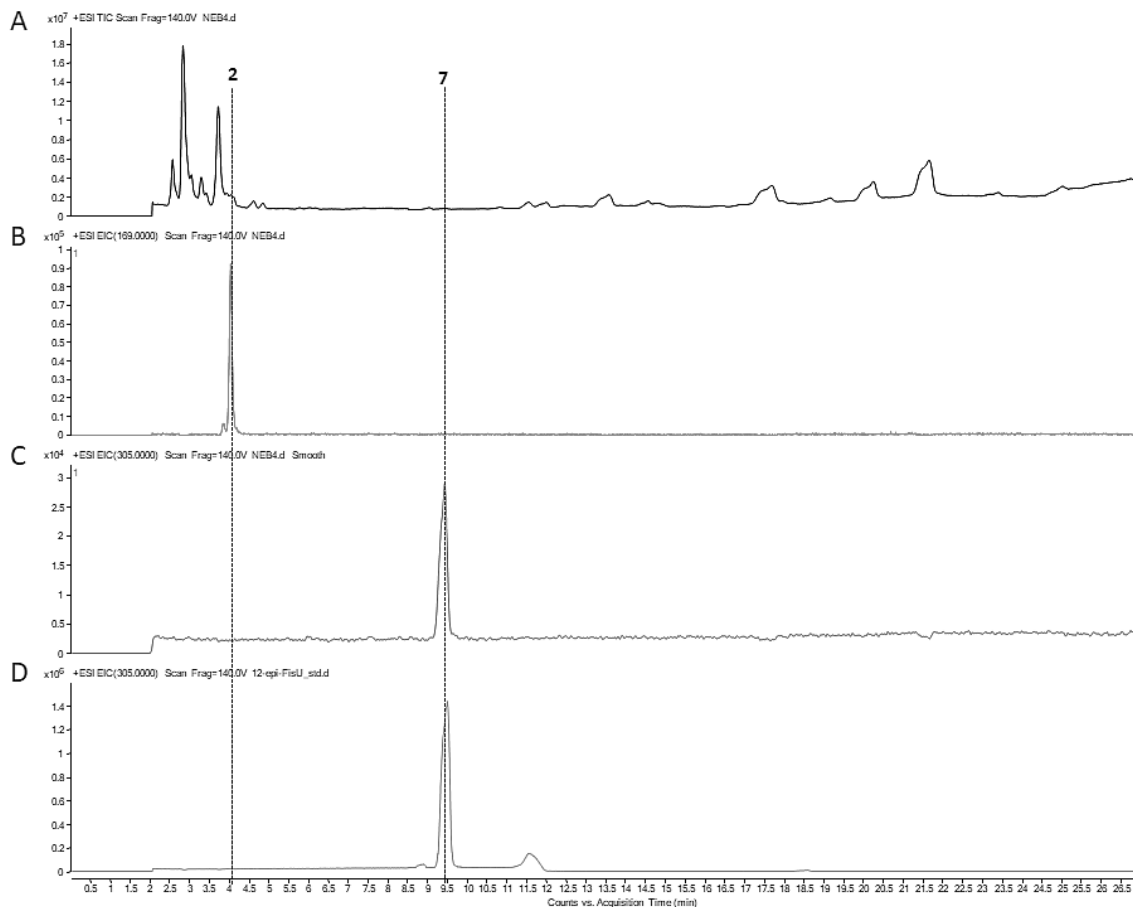

**Panel 2**

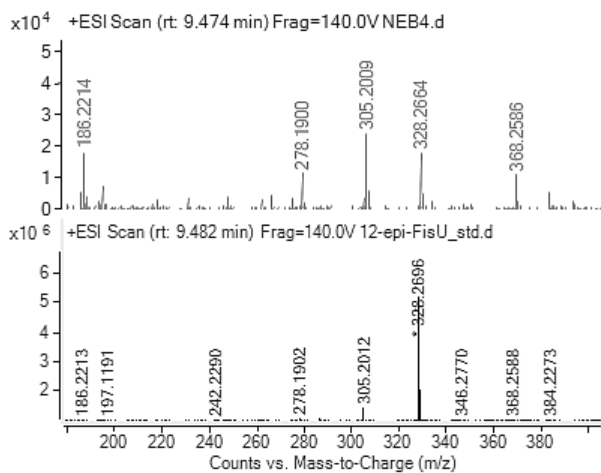

**Supplemental Figure S2: Total ion chromatogram (TIC), extracted ion chromatogram (EIC) and comparative MS data of Figure 6 (A-C).**

TIC (A) and EIC ( $m/z$  187.02) of fluorinated *cis*-indole isonitrile substrate **9** (Panel 1 and 3) and **10** (Panel 2 and 4), and the fluorinated hapalindole products **15**, **16** (Panel 1-2) and fischerindole products **17**, **18** (Panel 3-4) were compared with the standard **15**, **16**, **17** and **18** for the *in vitro* TT-assay performed in the presence FamD2 with FamC1 (Panel 1-2) or FisC (Panel 3-4) plasmids (for Figure 6). The '\*' represents 5F-/6F-12-*epi*-hapalindole-GPP (Panel 1-2) and 5F-/6F-12-*epi*-fischerindole-GPP (Panel 3-4). Panel 1, 2, 3 and 4 represents the Figure 6 A, 6B, 6C and 6D.

**Panel 1**

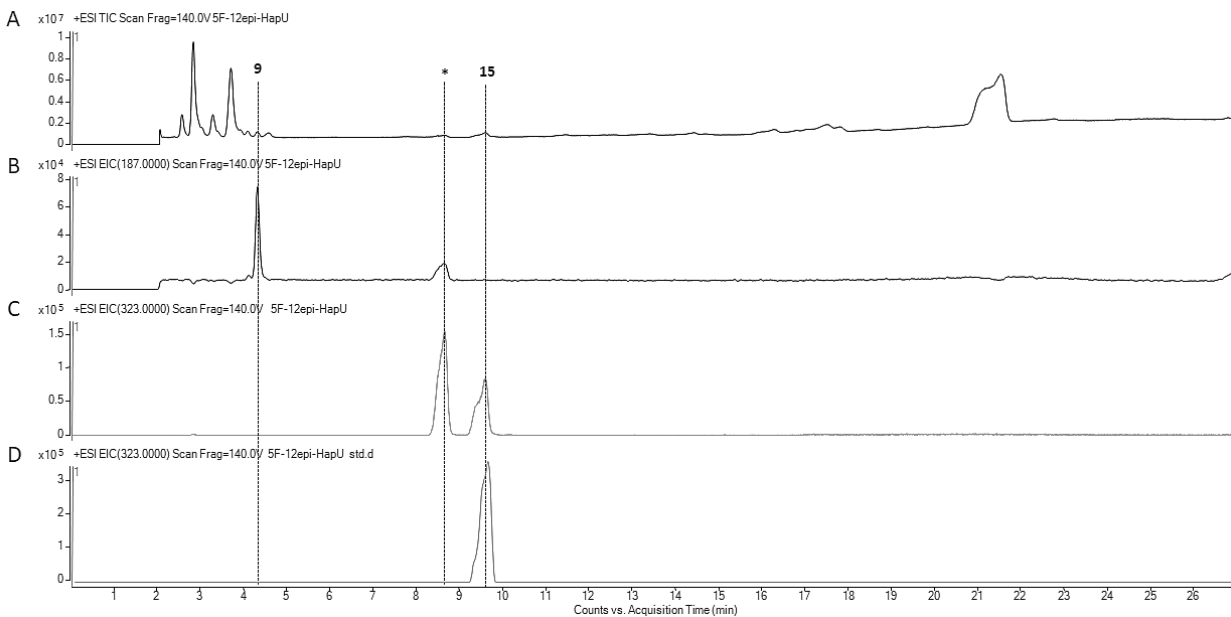

**Panel 2**

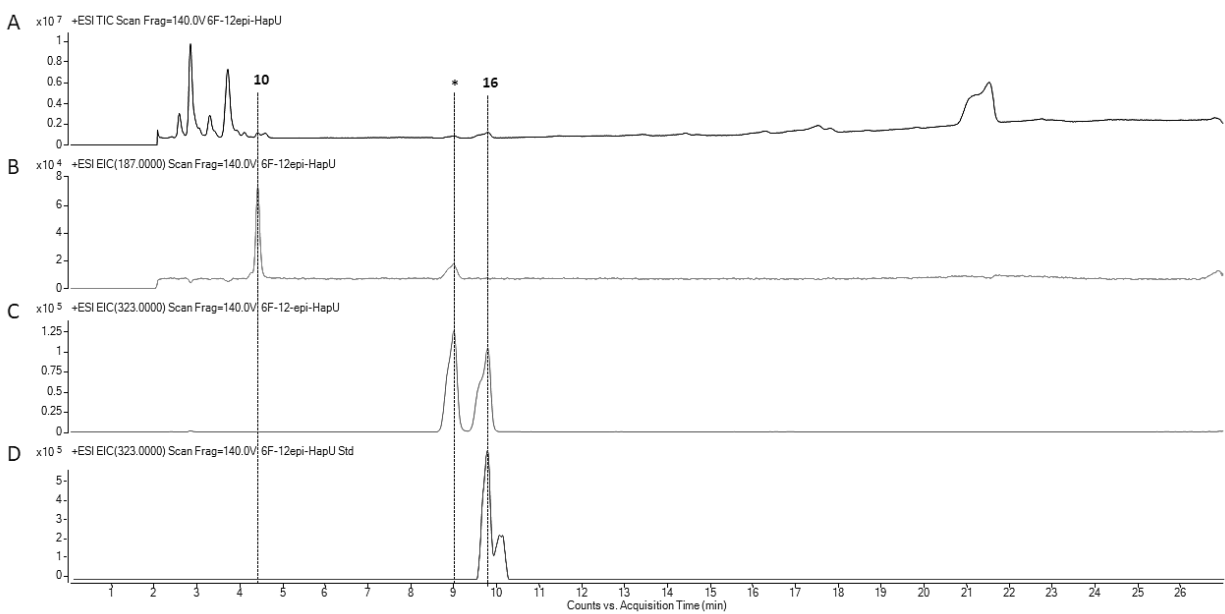



### Panel 3

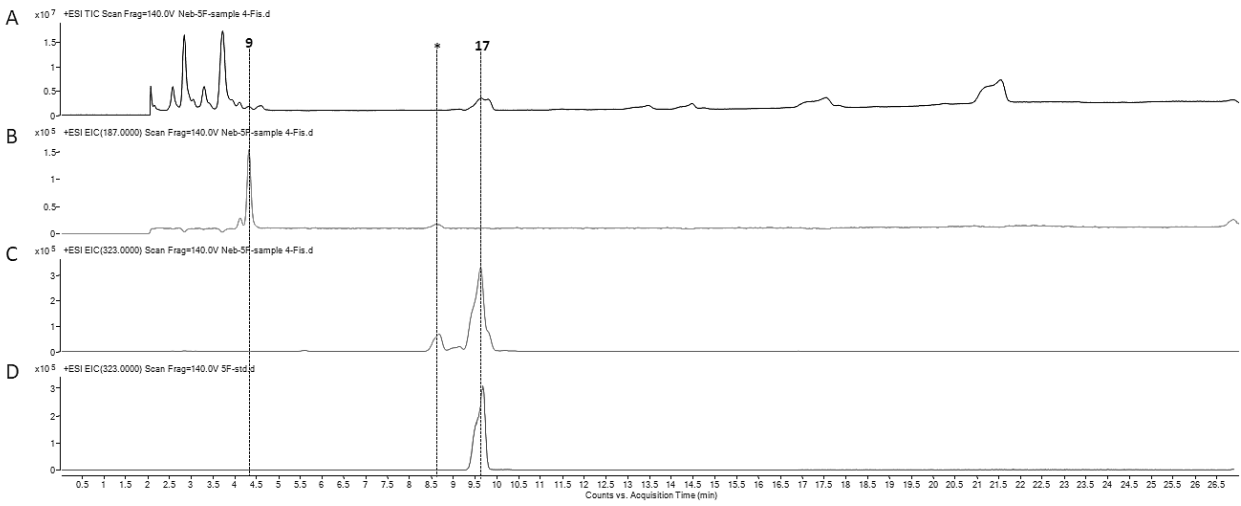

### Panel 4

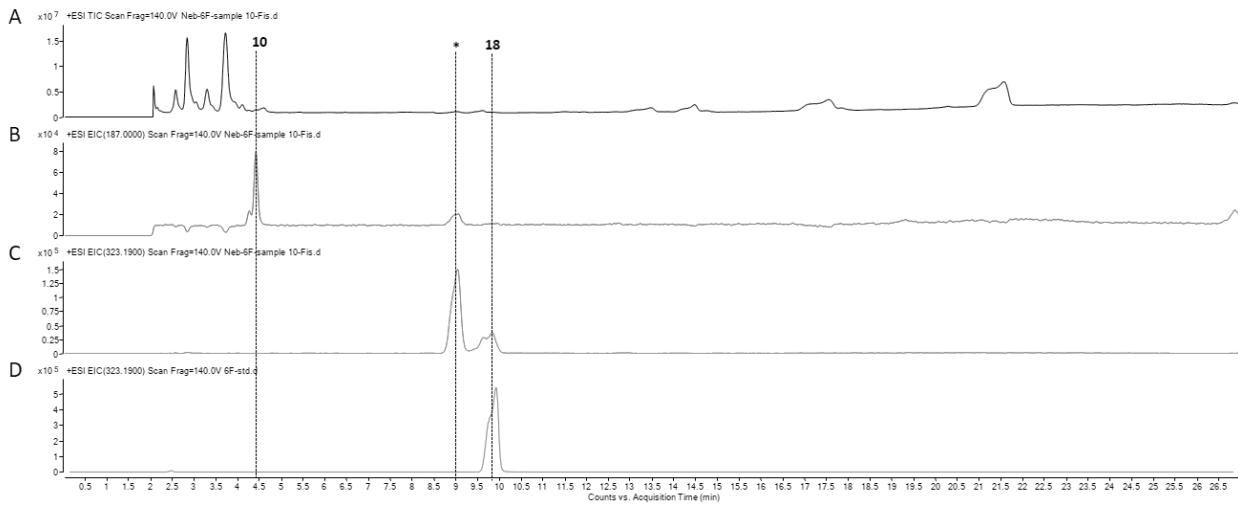

### Figure S3: Spectra of 5-fluoro-12-*epi*-hapalindole U (15)

$^1\text{H}$ ,  $^{13}\text{C}$ , COSY, HSQC, HMBC NMR spectra and HRMS of 5-F-12-*epi*-Hapalindole U **15** in  $\text{C}_6\text{D}_6$  at 600 MHz and 125 MHz respectively.

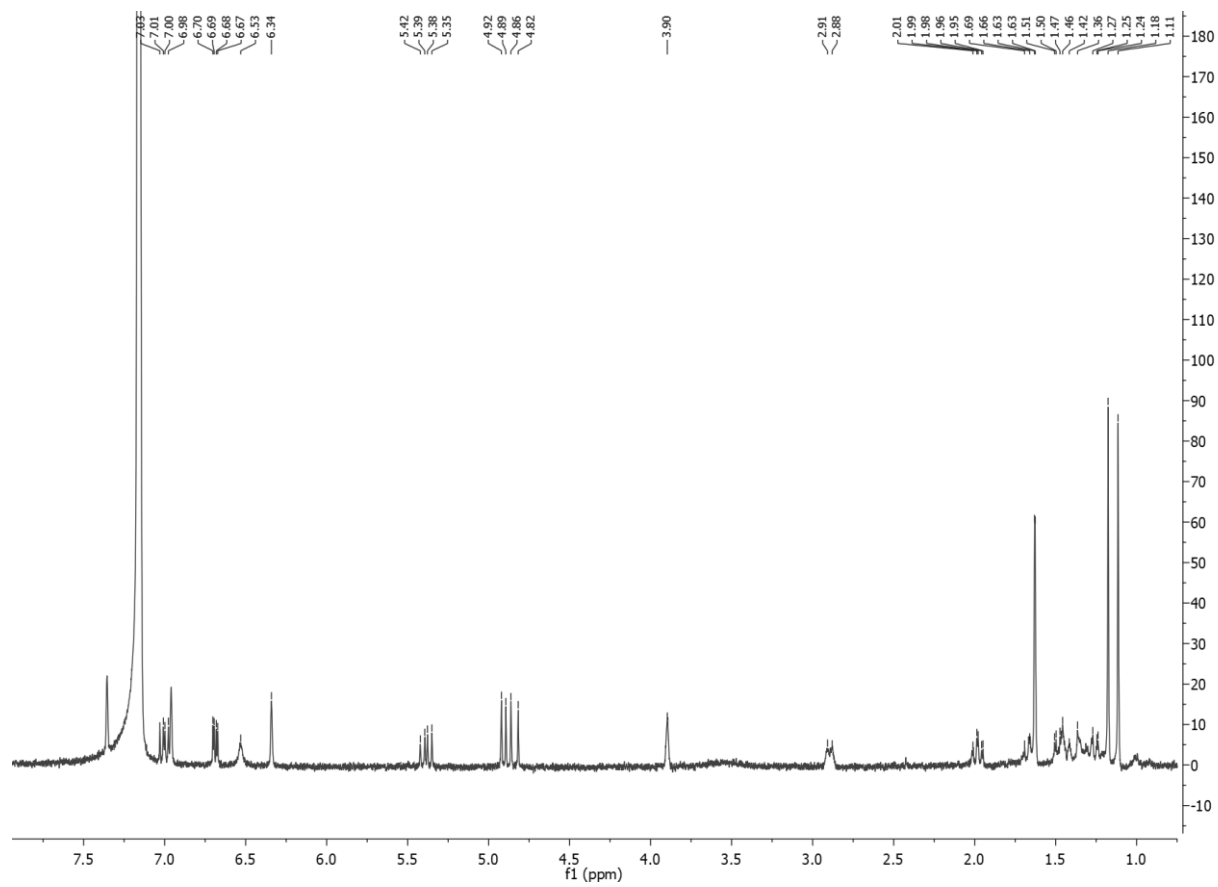

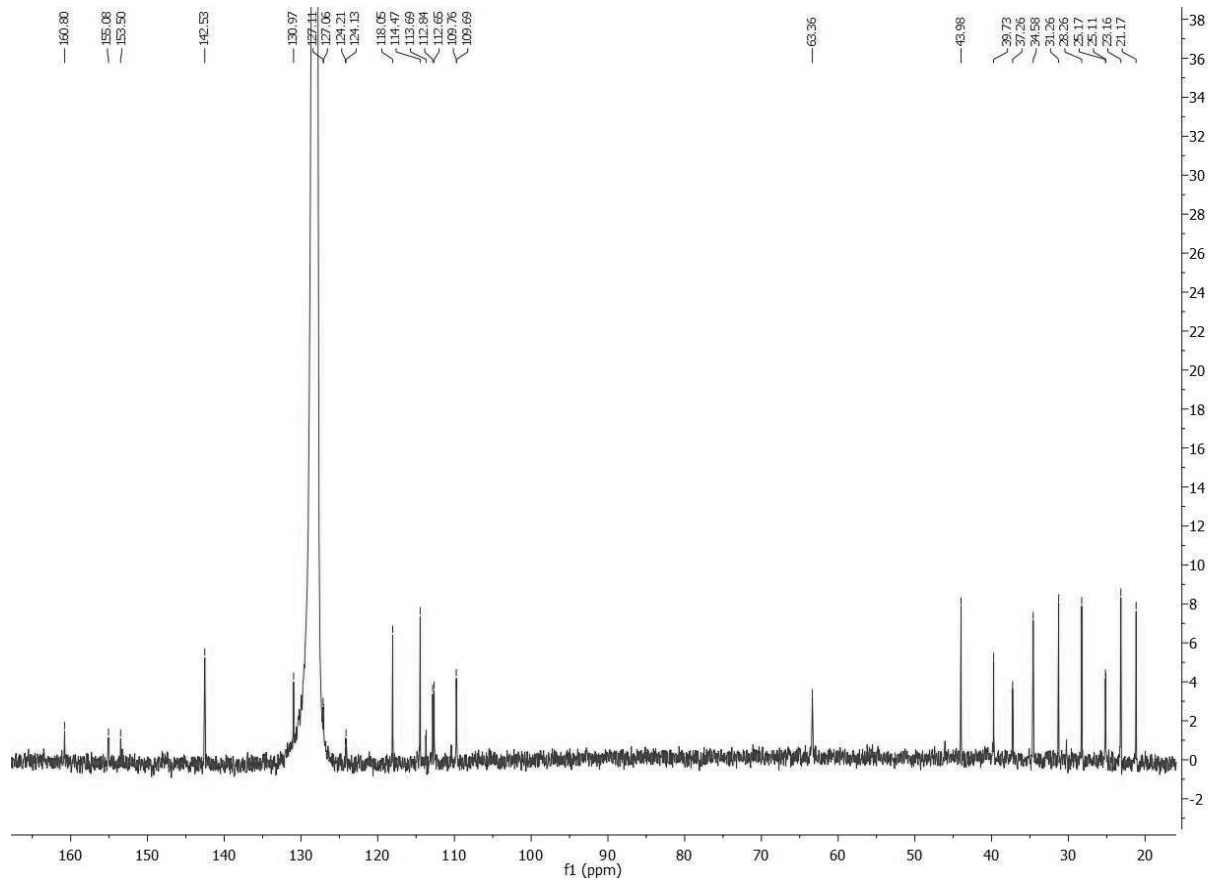

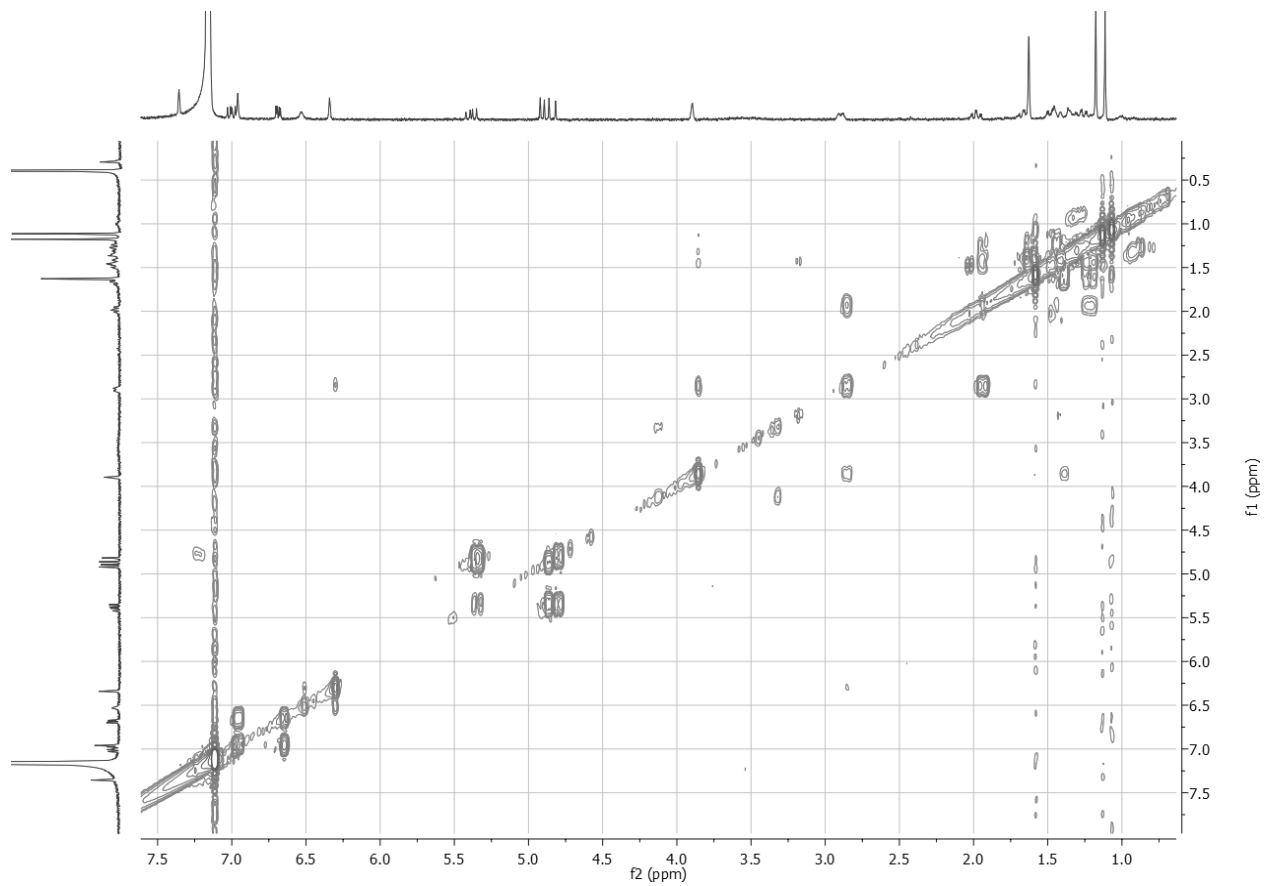

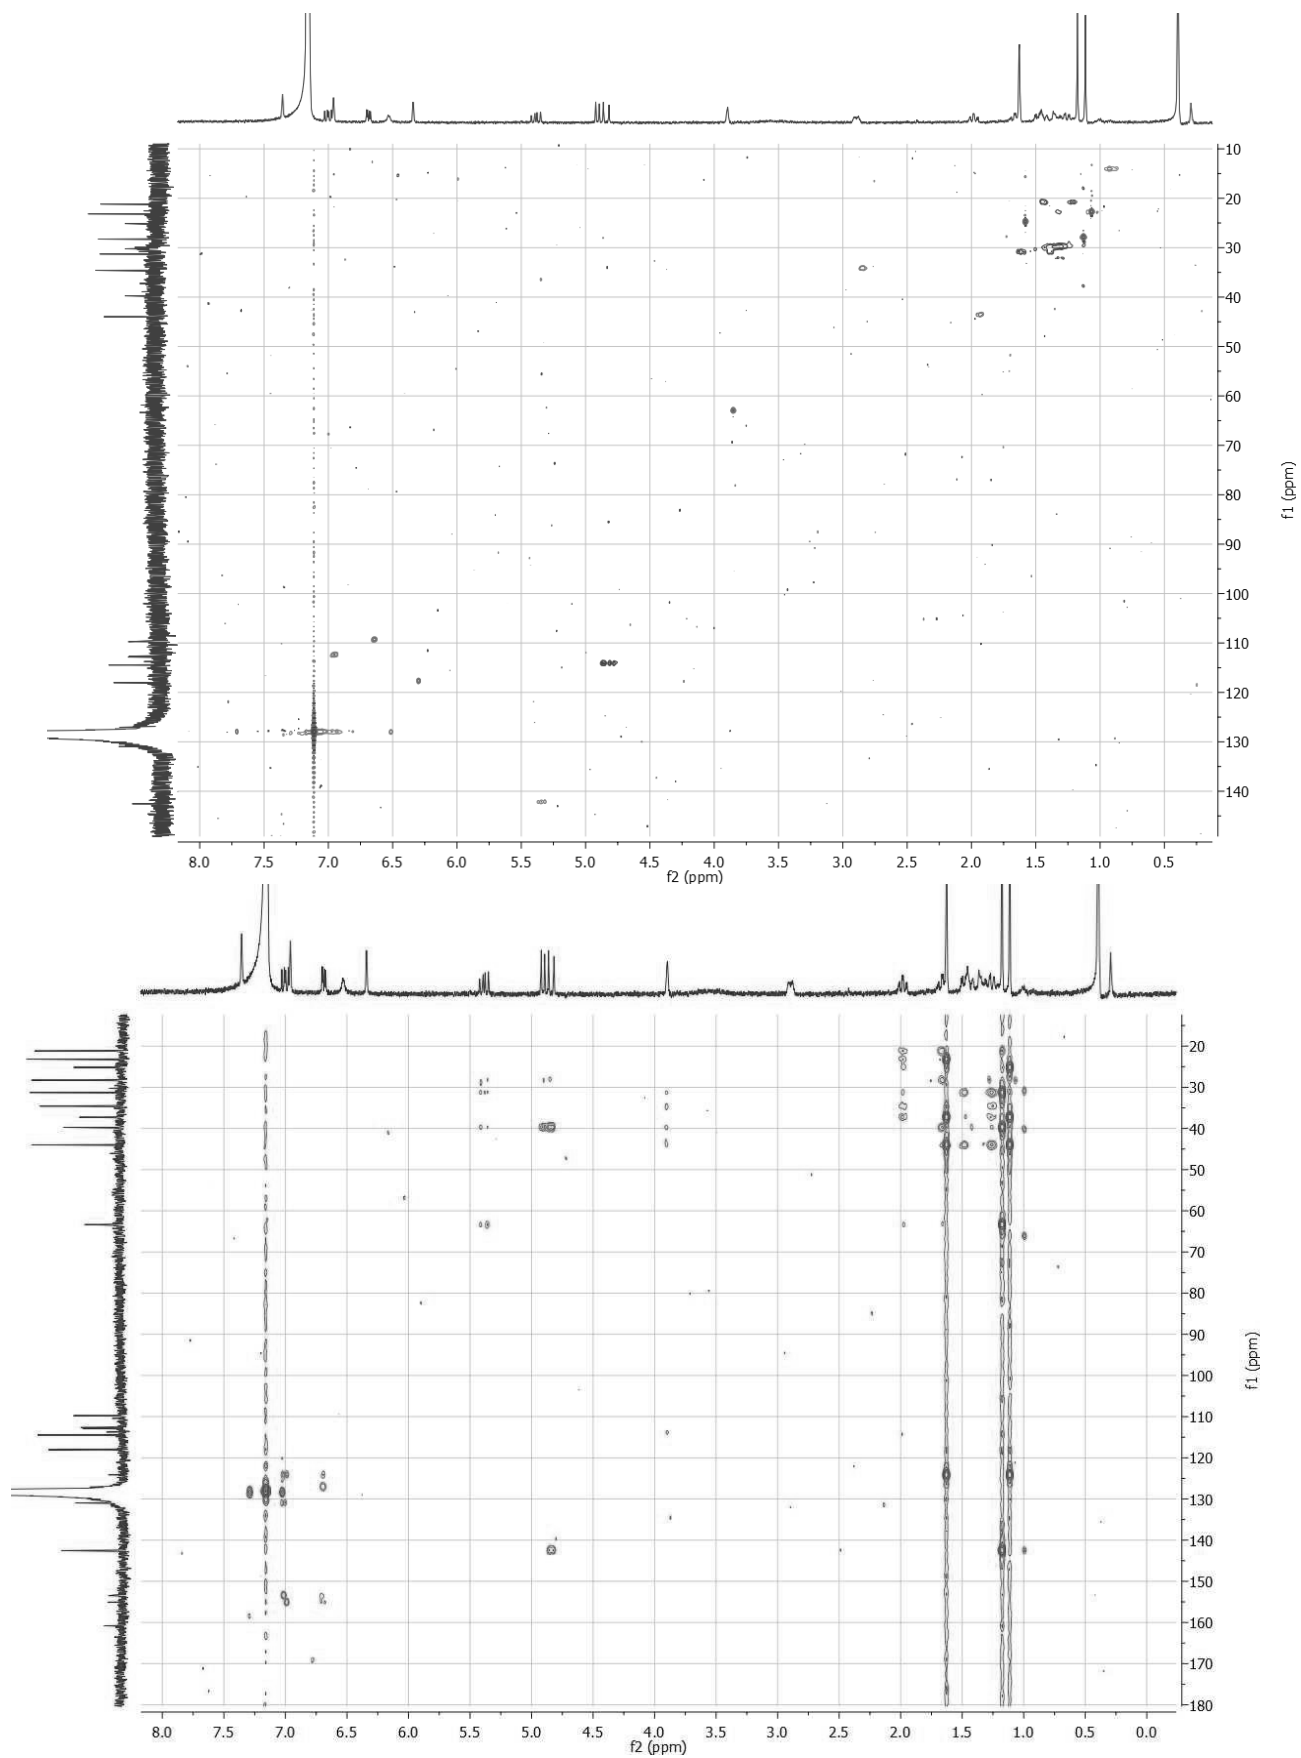

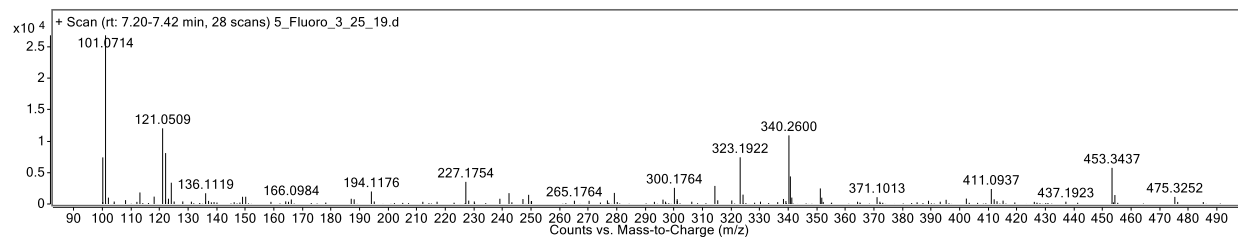

Calc. [M+H]<sup>+</sup> 323.1918 Obsv. 323.1922

**Figure S4: Spectra of 6-fluoro-12-*epi*-hapalindole U (16)**

$^1\text{H}$ ,  $^{13}\text{C}$ , COSY, HSQC, HMBC NMR spectra and HRMS of 6-F-12-*epi*-Hapalindole U **16** in  $\text{C}_6\text{D}_6$  at 600 MHz for  $^1\text{H}$  and COSY, 800 MHz for HSQC and HMBC, and 201 MHz respectively.

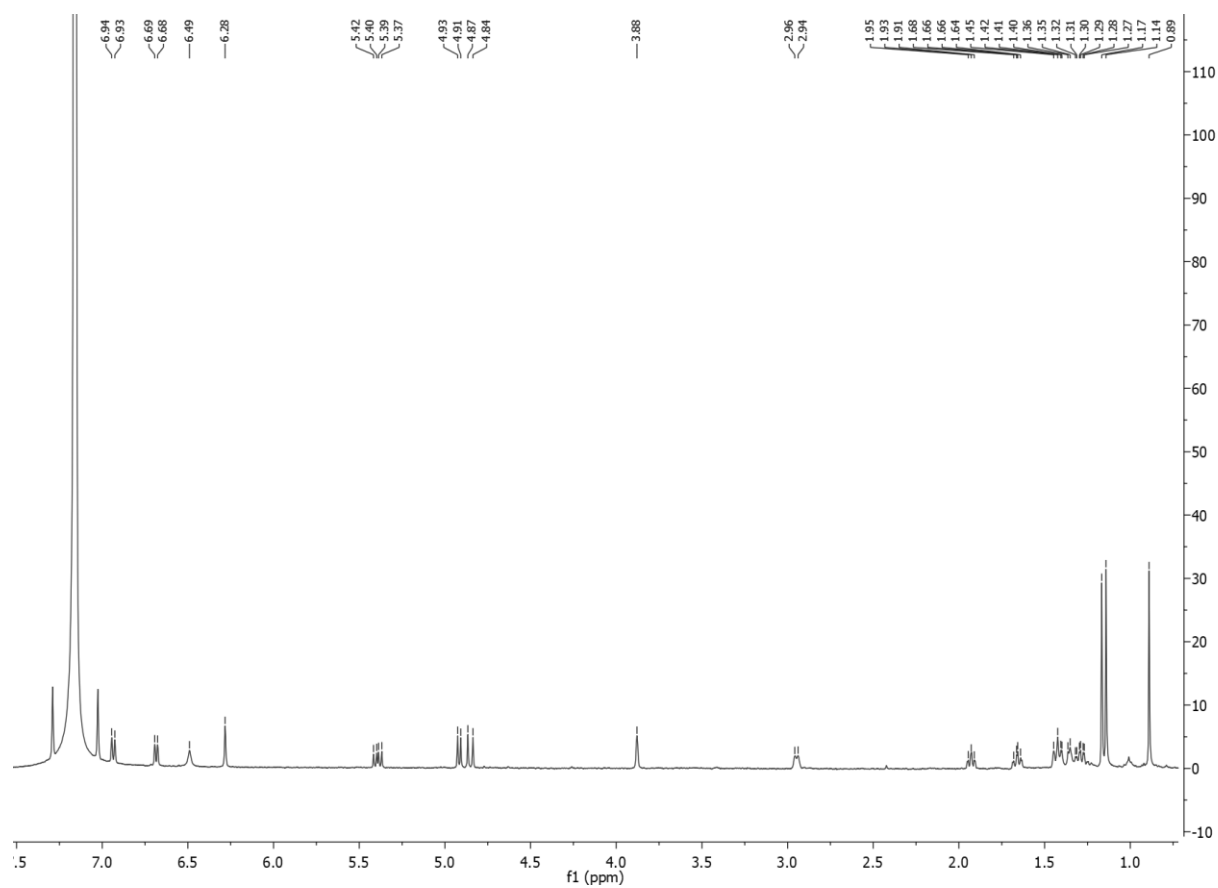

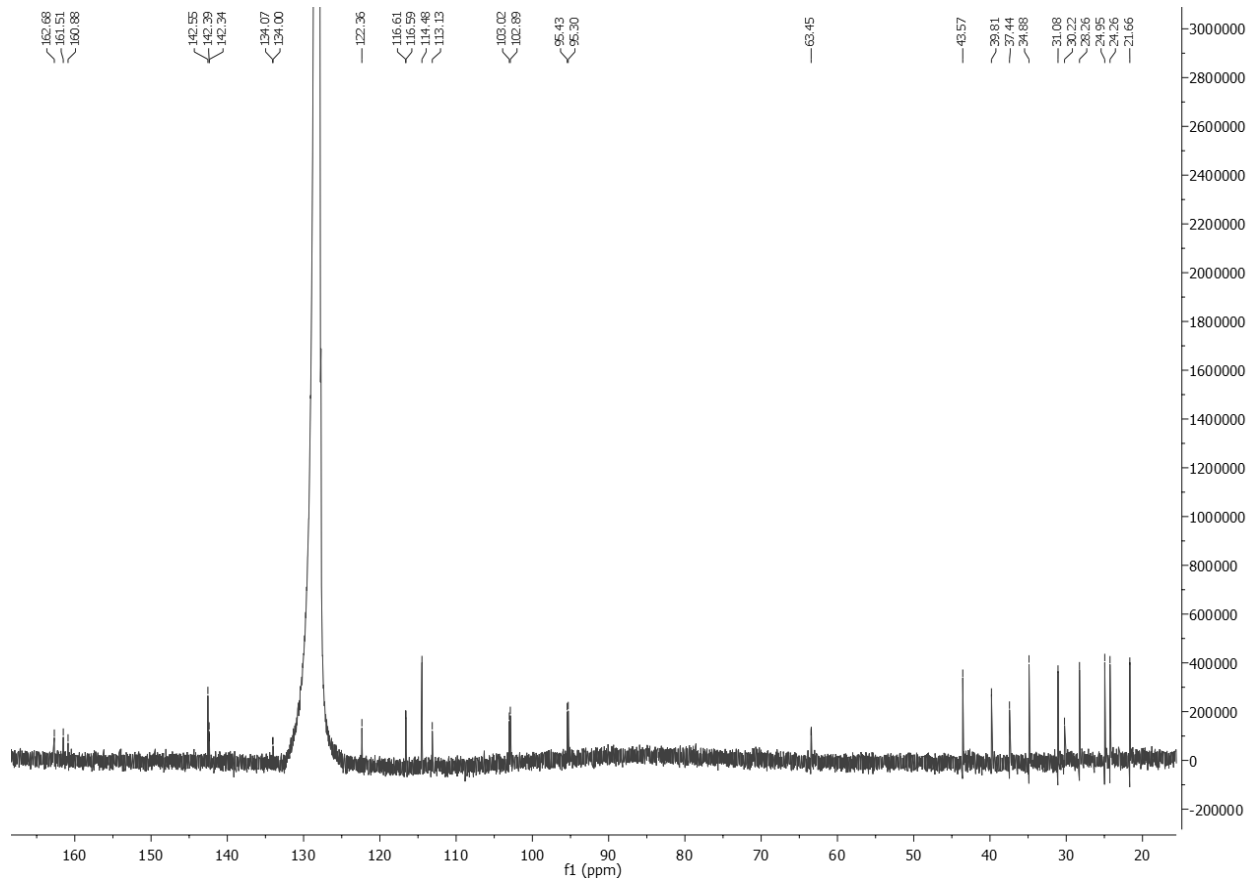



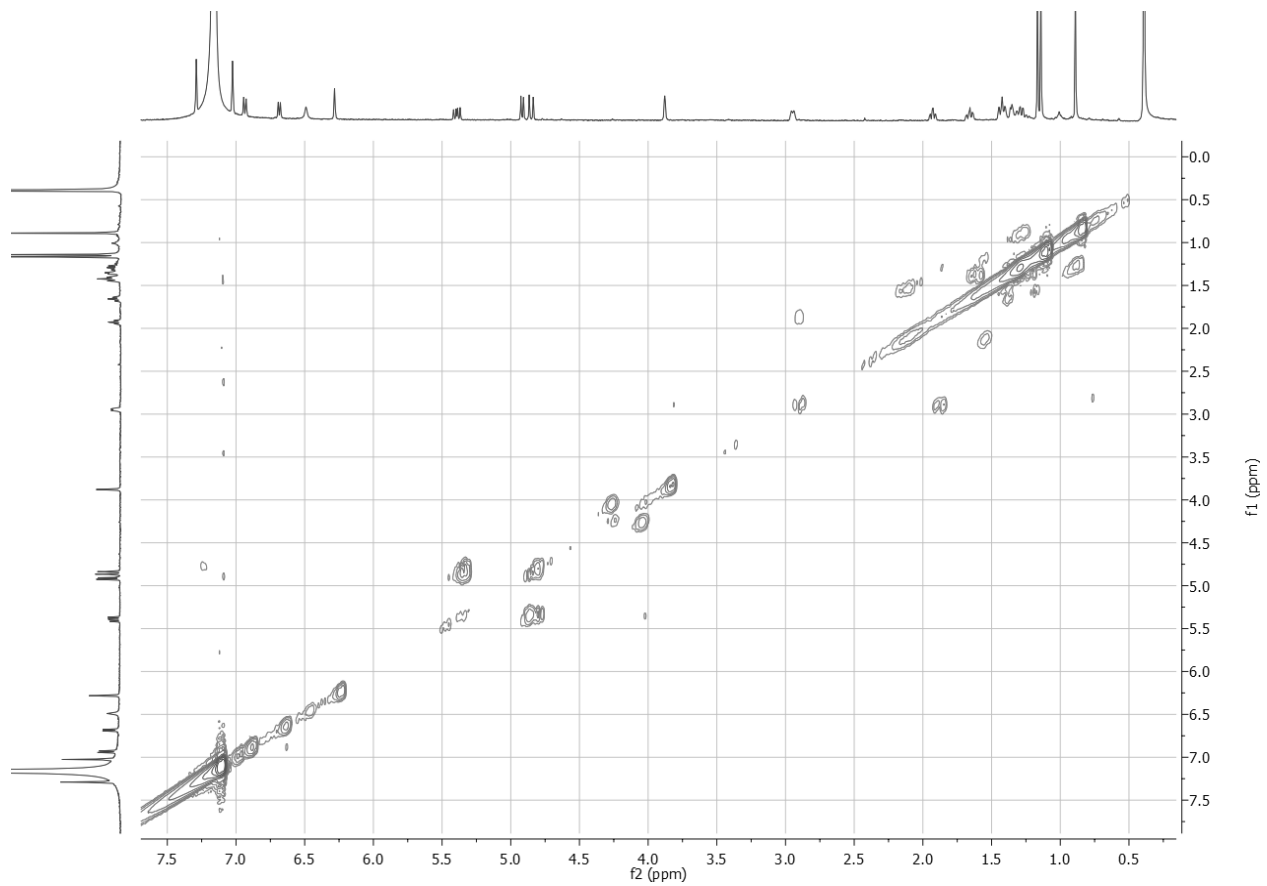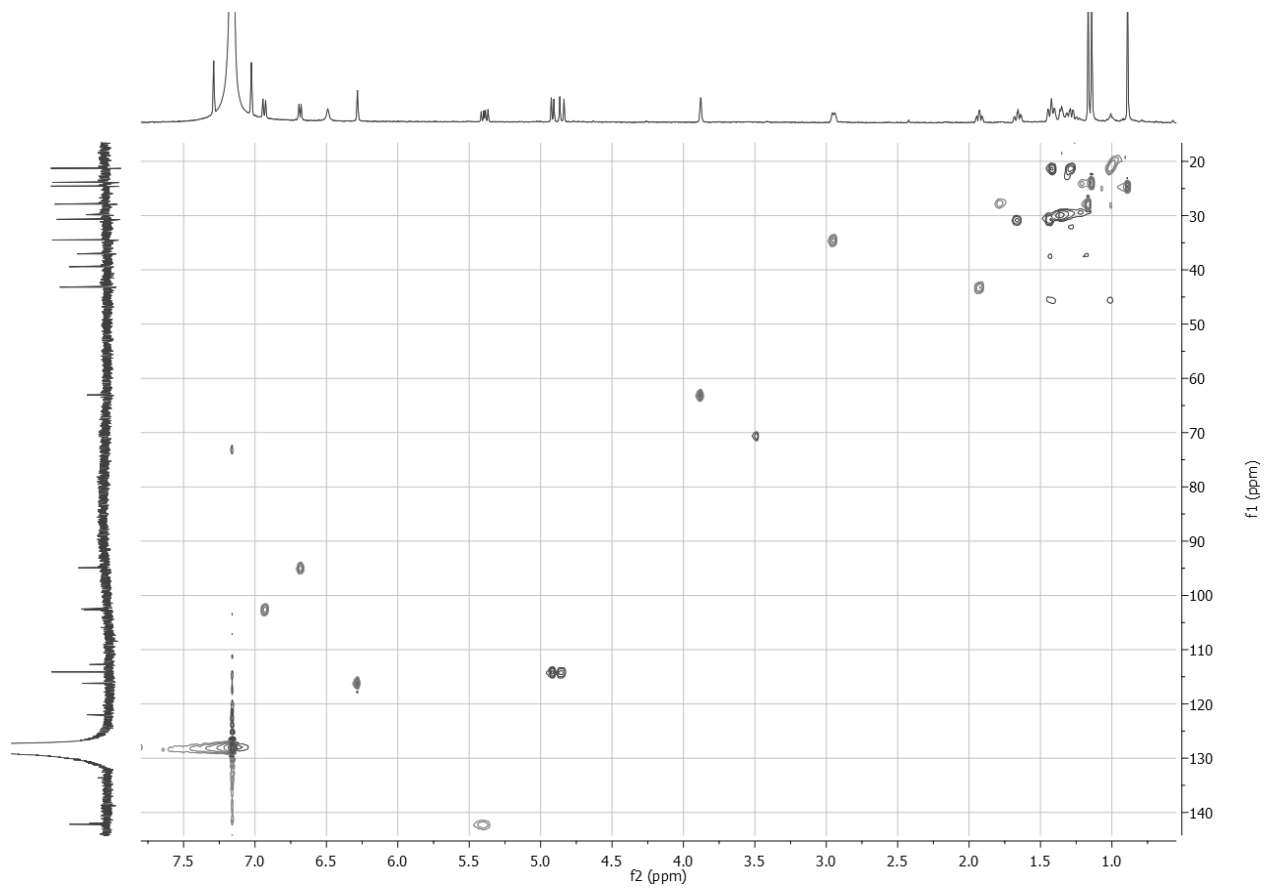

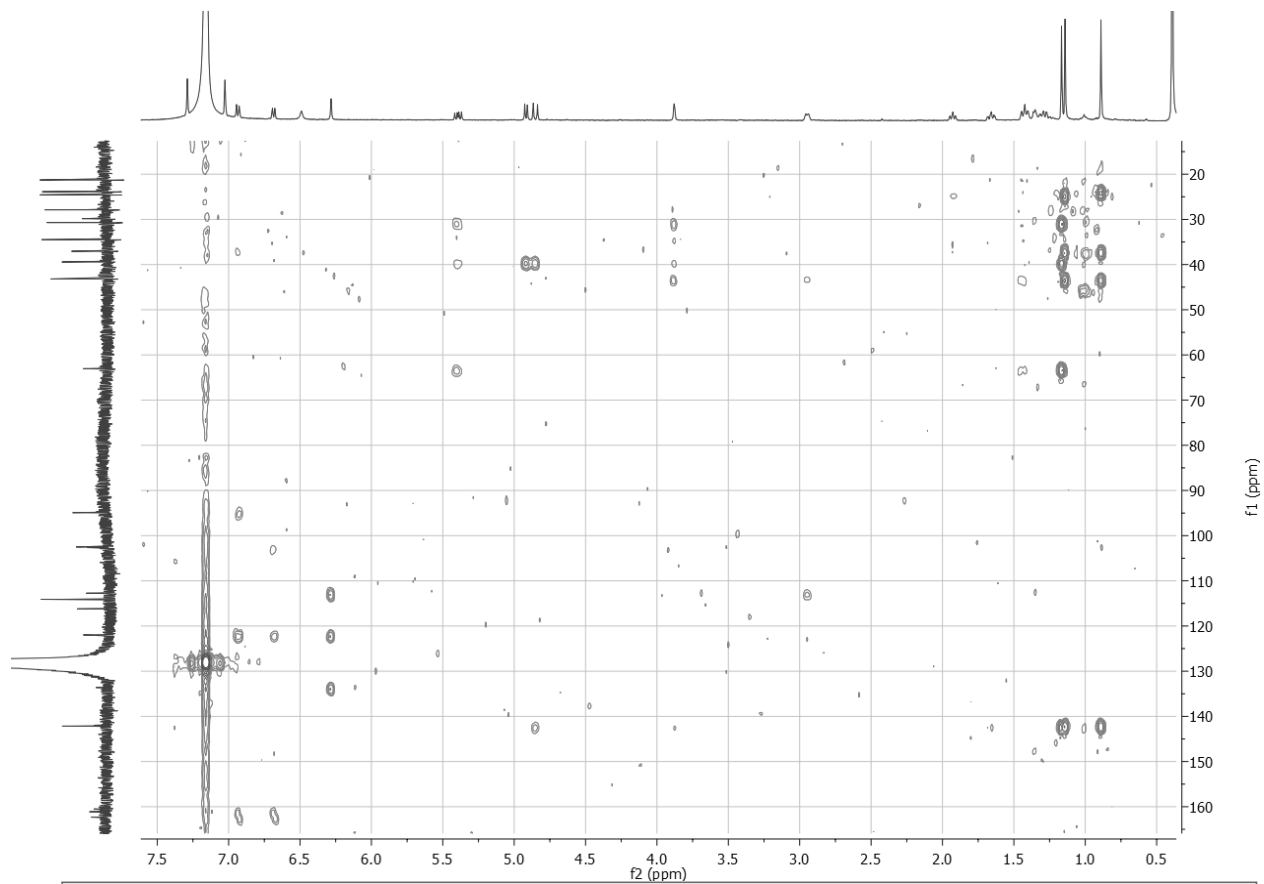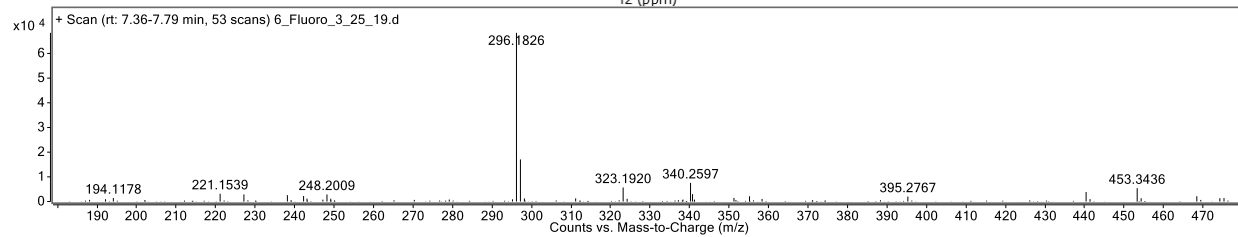

Calc. [M+H]<sup>+</sup> 323.1918 Obsv. 323.1920



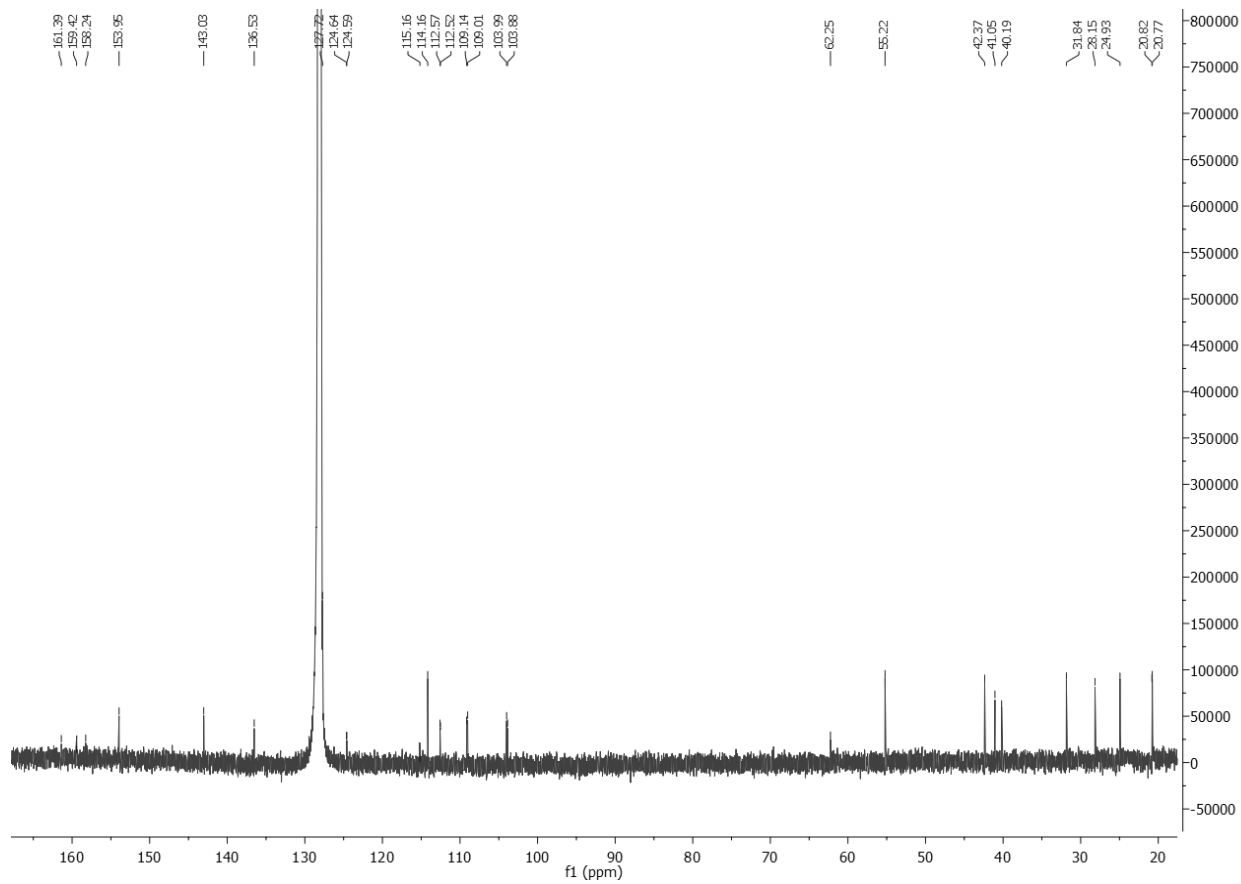

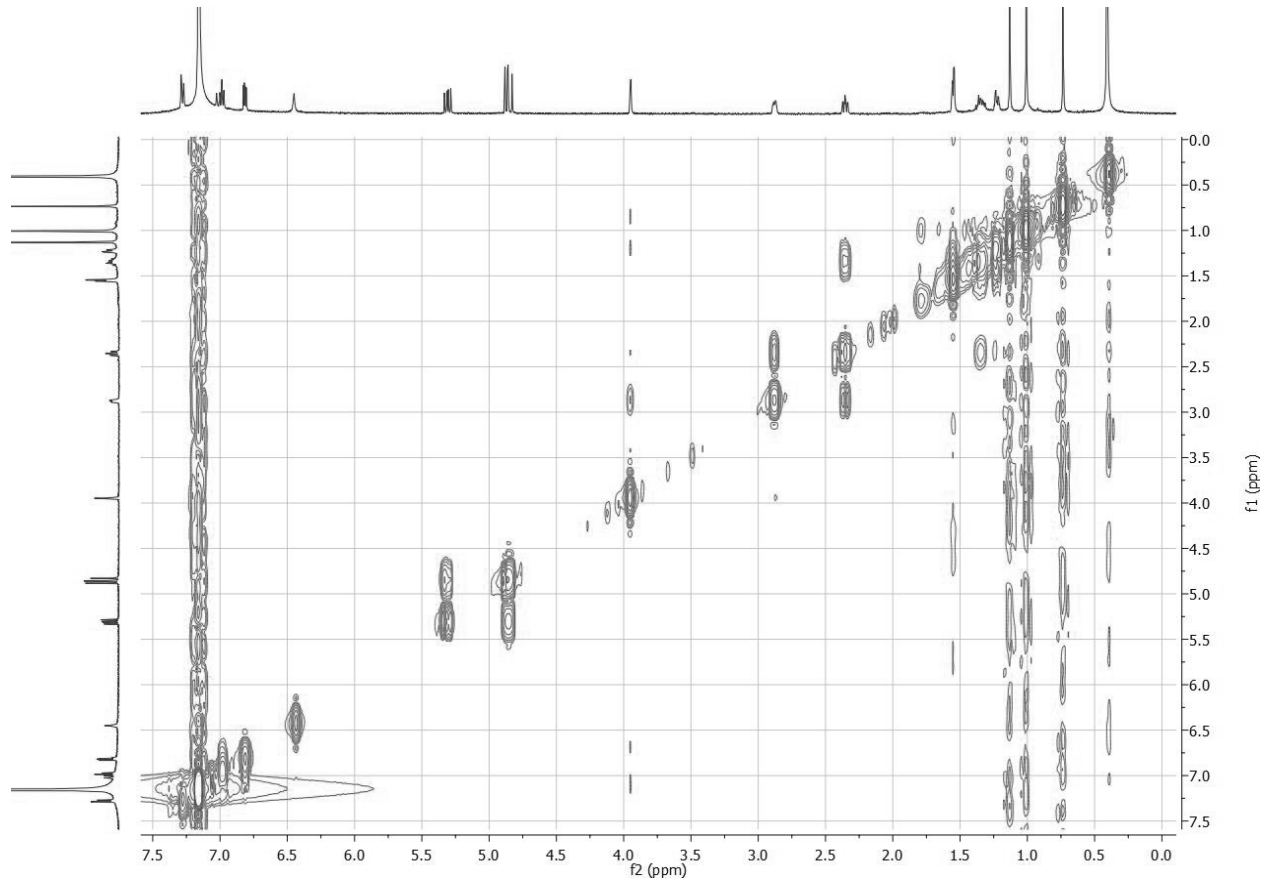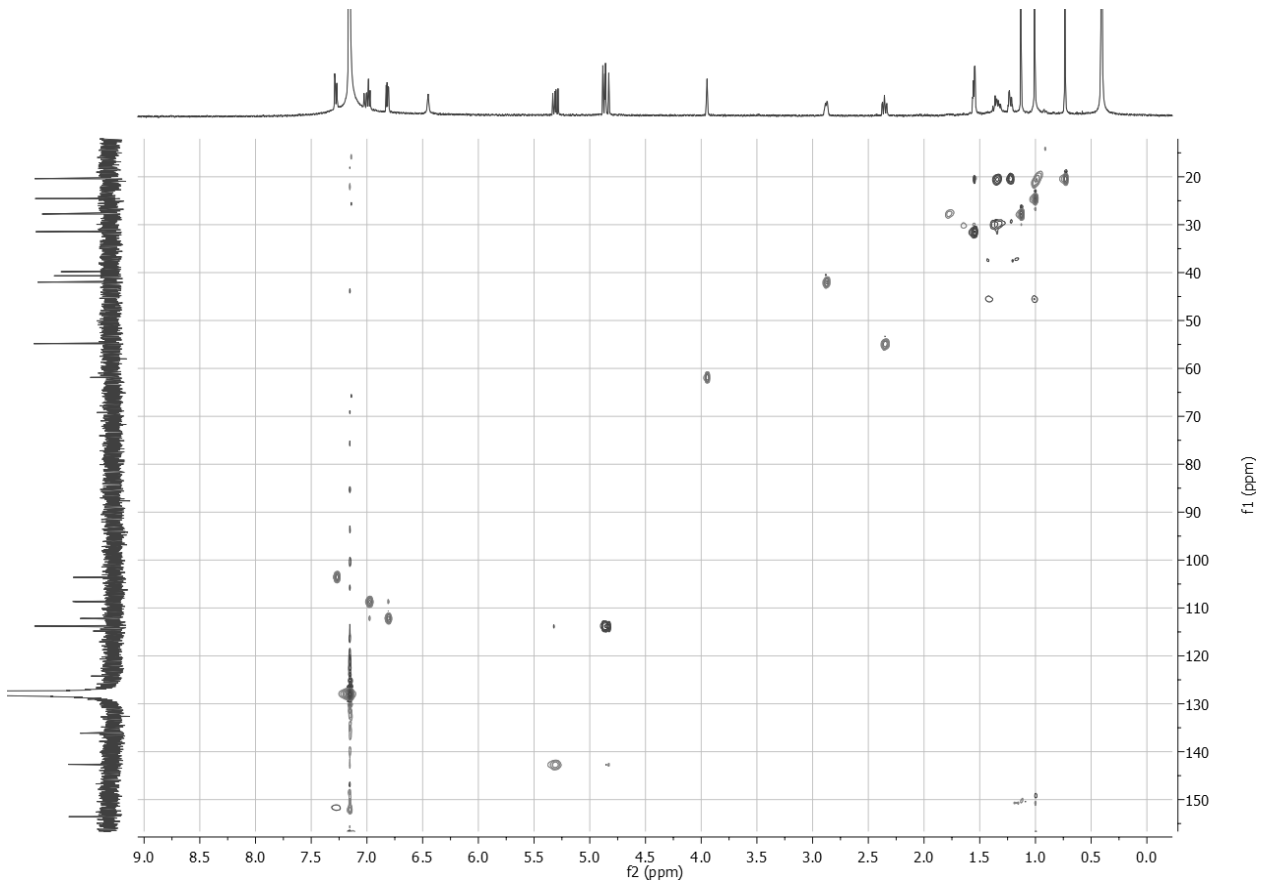

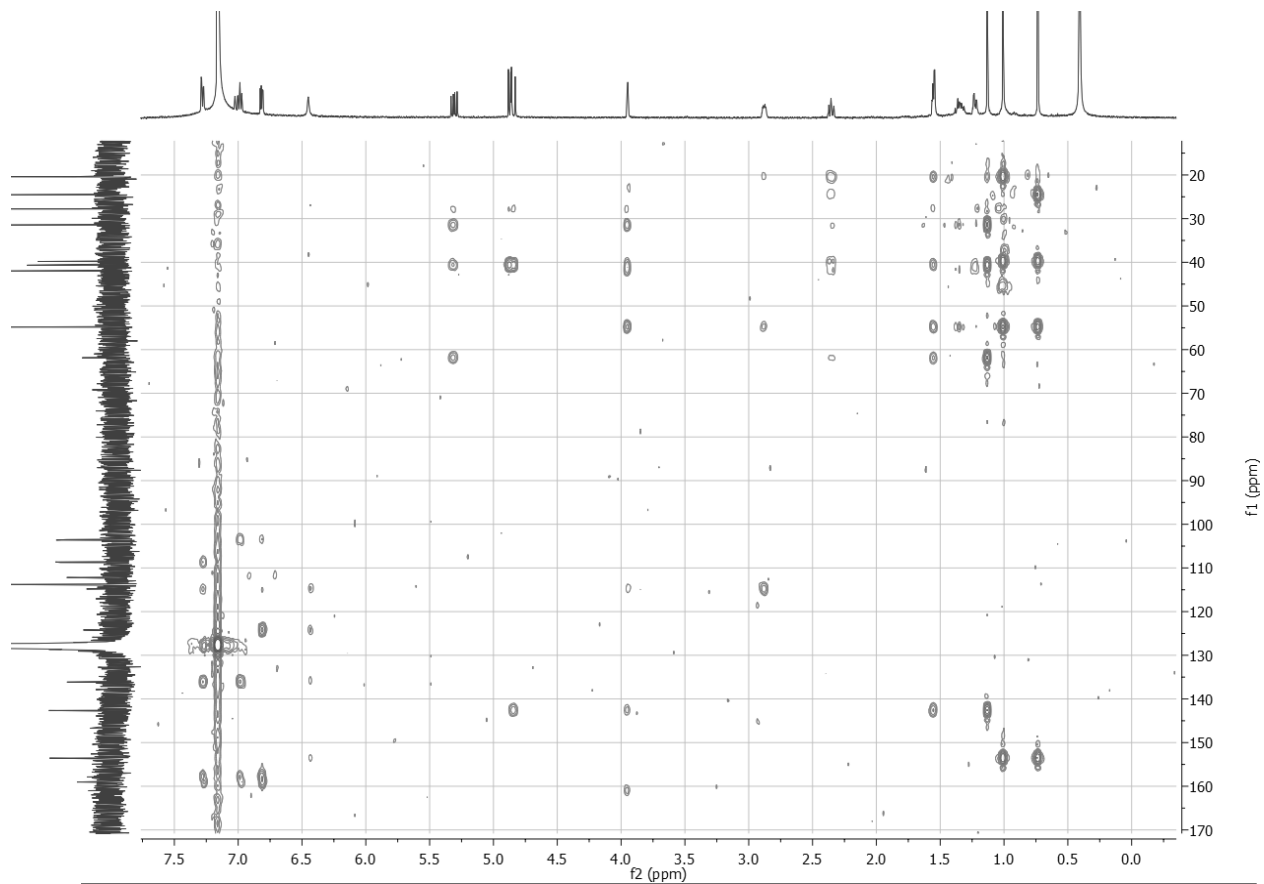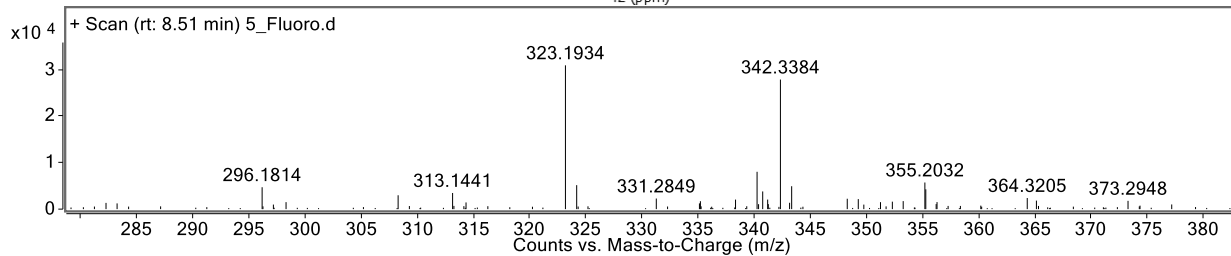

Calc. [M+H]<sup>+</sup> 323.1918 Obsv. 323.1934



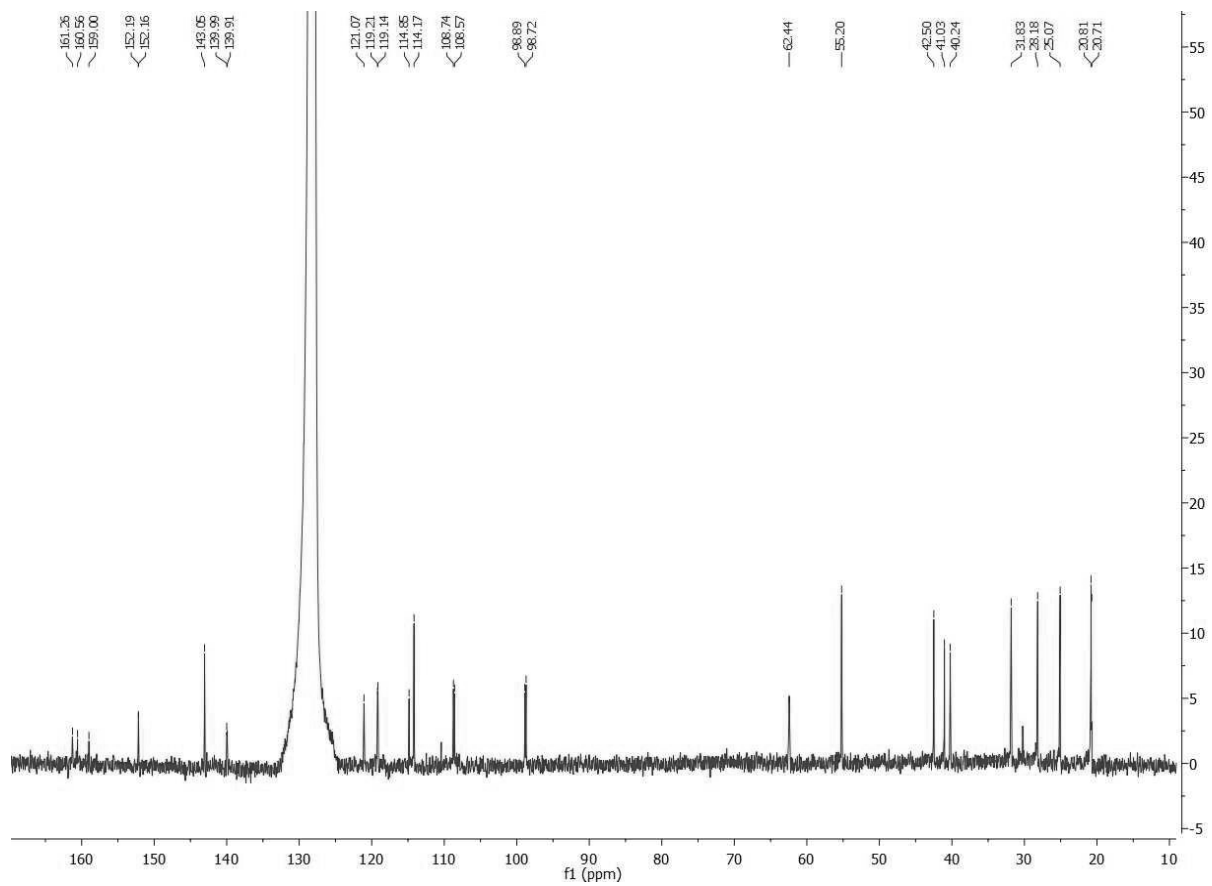



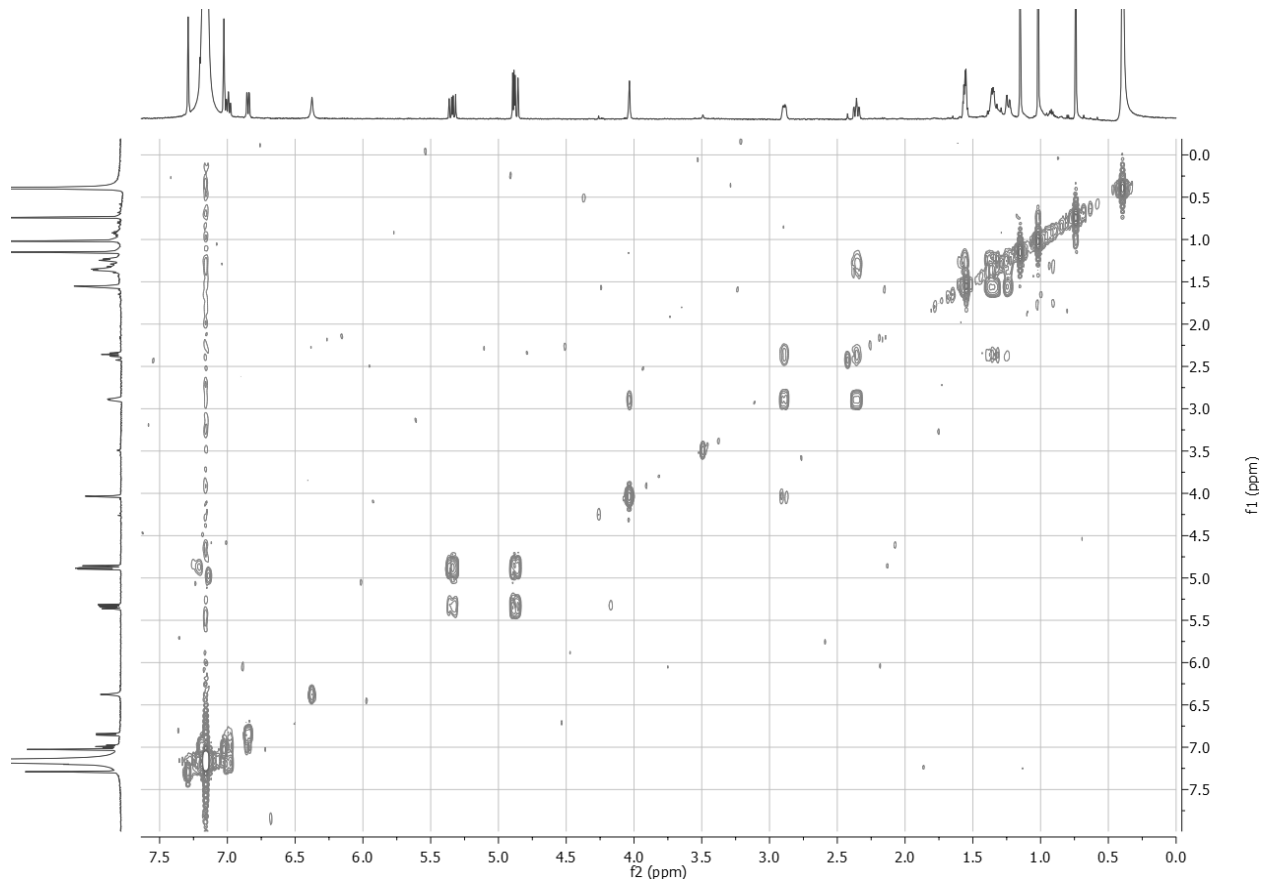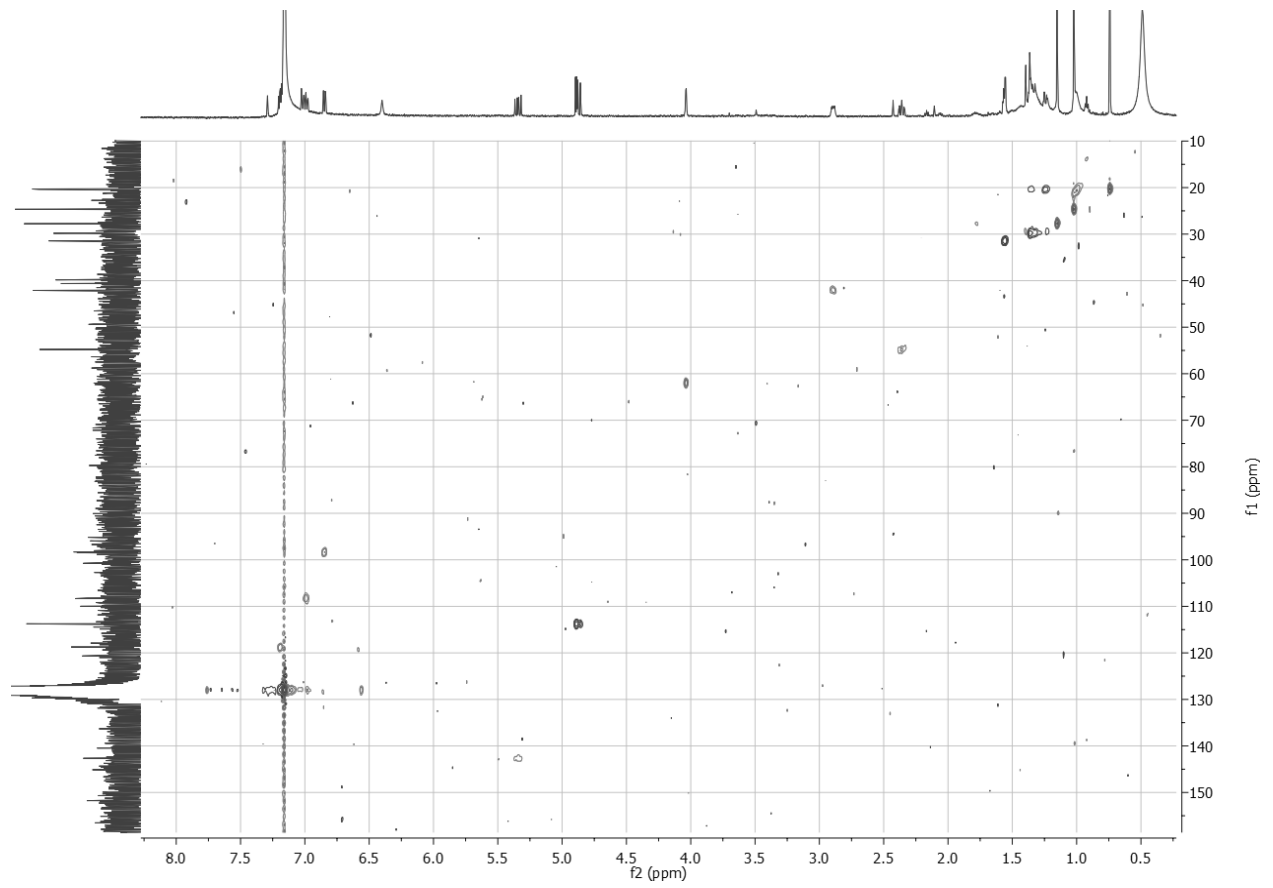

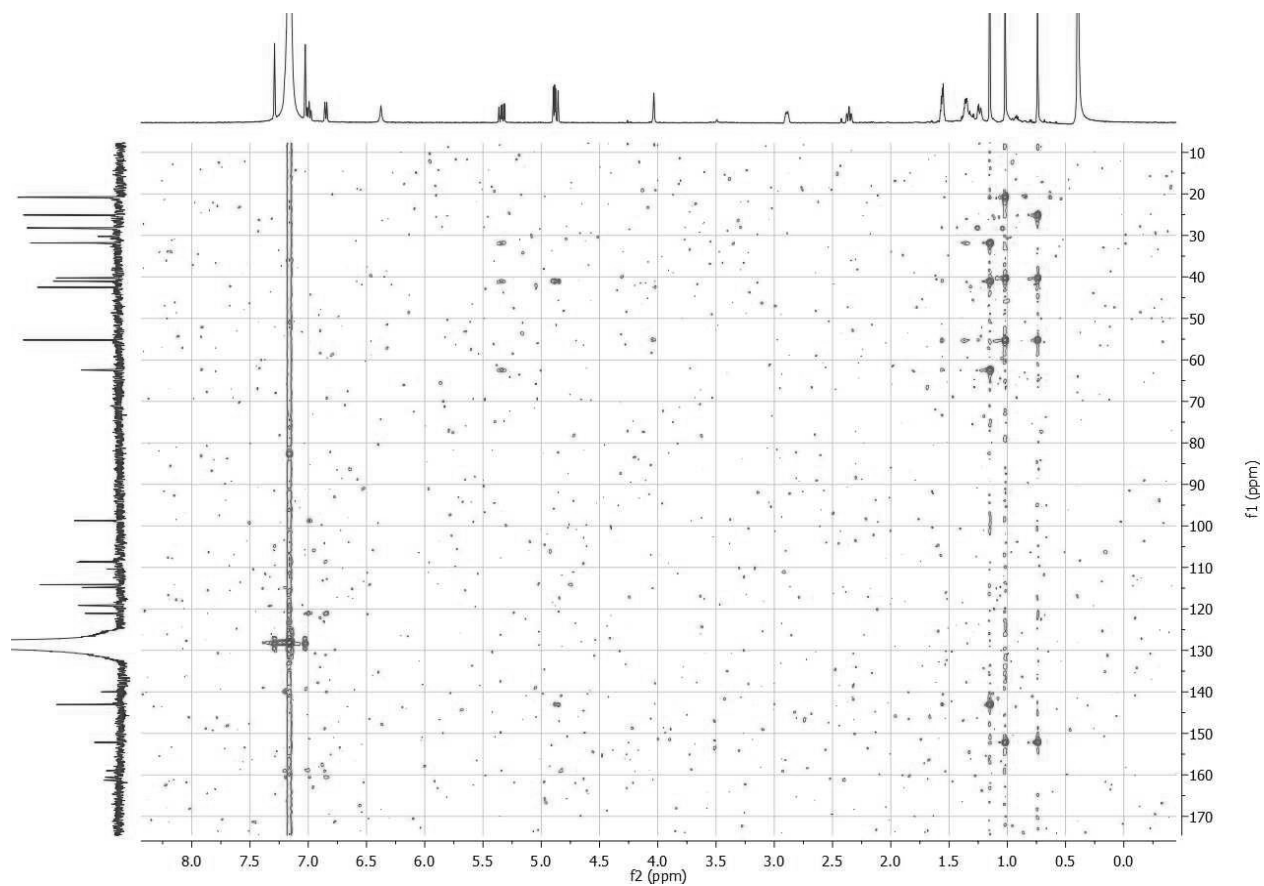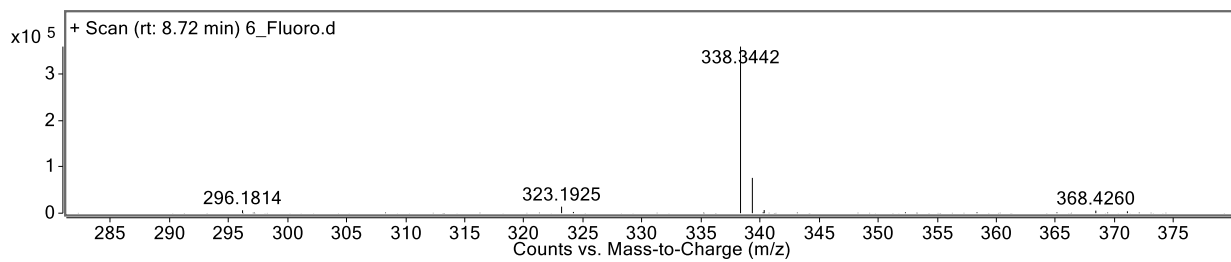

Calc. [M+H]<sup>+</sup> 323.1918 Obsv. 323.1925
