# Supplementary material
Source: PubMed Central journal article supplement (PMC7323787)
Supplement: NIHMS1595548-supplement-Supplemental_Tables.pdf [file NIHMS1595548-supplement-Supplemental_Tables.pdf]

## Supplemental Table

Table S1: Assigned numeral representation for the synthetic substrates, prenyltransferase and the Stig cyclases involved in the biosynthesis of natural and unnatural hapalindole/fischerindole are shown.

| Synthesis/<br>Designated Protein                  | Substrate                               | Product                                  | Assigned<br>Number |
|---------------------------------------------------|-----------------------------------------|------------------------------------------|--------------------|
| <b>Natural hapalindole/fischerindole system</b>   |                                         |                                          |                    |
| Synthesized                                       | geranyl pyrophosphate (GPP)             |                                          | <b>1</b>           |
| Synthesized                                       | <i>cis</i> -indole isonitrile           |                                          | <b>2</b>           |
| <b>Enzymes</b>                                    |                                         |                                          |                    |
| Prenyltransferase (FamD2)                         | <b>1 and 2</b>                          | <i>cis</i> -indole isonitrile-GPP (3GC)  | <b>3</b>           |
| <b>Sig cyclases</b>                               |                                         |                                          |                    |
| FamC1                                             | <b>3</b>                                | 12- <i>epi</i> -hapalindole U            | <b>4</b>           |
| FamC1 and FamC4                                   | <b>3</b>                                | Hapalindole U                            | <b>5</b>           |
| FamC3 and FamC4                                   | <b>3</b>                                | Hapalindole H                            | <b>6</b>           |
| FisC                                              | <b>3</b>                                | 12- <i>epi</i> -fischerindole U          | <b>7</b>           |
| <b>Unnatural hapalindole/fischerindole system</b> |                                         |                                          |                    |
| Synthesized                                       | 5-fluoro- <i>cis</i> -indole isonitrile |                                          | <b>9</b>           |
| Synthesized                                       | 6-fluoro- <i>cis</i> -indole isonitrile |                                          | <b>10</b>          |
| <b>Enzymes</b>                                    |                                         |                                          |                    |
| FamC1                                             | <b>1 and 9</b>                          | 5-fluoro-12- <i>epi</i> -hapalindole U   | <b>15</b>          |
| FamC1                                             | <b>1 and 10</b>                         | 6-fluoro-12- <i>epi</i> -hapalindole U   | <b>16</b>          |
| FisC                                              | <b>1 and 9</b>                          | 5-fluoro-12- <i>epi</i> -fischerindole U | <b>17</b>          |
| FisC                                              | <b>1 and 10</b>                         | 6-fluoro-12- <i>epi</i> -fischerindole U | <b>18</b>          |

Table S2: Proteomics analysis of FamD2 expression in the TT-assay containing exogenous plasmids FamD2, and the substrates 1 and 2 during *cis*-indole isonitrile-GPP intermediate 3 synthesis. The sequence highlighted in yellow showed the coverage of the synthesized protein. Note: Please see attached Excel Sheet 1

| FamD2                                                                                                                                                                                                                                                                                                                                                                                  |                    |           |
|----------------------------------------------------------------------------------------------------------------------------------------------------------------------------------------------------------------------------------------------------------------------------------------------------------------------------------------------------------------------------------------|--------------------|-----------|
| Total peptide                                                                                                                                                                                                                                                                                                                                                                          | 25                 |           |
| Unique peptide                                                                                                                                                                                                                                                                                                                                                                         | 25                 |           |
| Total PSM                                                                                                                                                                                                                                                                                                                                                                              | 906                |           |
| Coverage (%)                                                                                                                                                                                                                                                                                                                                                                           | 72.49              |           |
| Annotated Peptide Sequence                                                                                                                                                                                                                                                                                                                                                             | Sequence Positions | PSM FamD2 |
| [-].MNDVNR.[I]                                                                                                                                                                                                                                                                                                                                                                         | FamD2[1-6]         | 1         |
| [R].IRTDIINVAK.[T]                                                                                                                                                                                                                                                                                                                                                                     | FamD2 [7-16]       | 30        |
| [R].TDIINVAK.[T]                                                                                                                                                                                                                                                                                                                                                                       | FamD2 [9-16]       | 11        |
| [K].TFGAEYSEK.[V]                                                                                                                                                                                                                                                                                                                                                                      | FamD2 [17-25]      | 14        |
| [K].VLDEVFQVFGEQFADNSFMIR.[T]                                                                                                                                                                                                                                                                                                                                                          | FamD2 [26-46]      | 155       |
| [R].TSNKQPK.[L]                                                                                                                                                                                                                                                                                                                                                                        | FamD2 [47-54]      | 10        |
| [R].TSNKQPKLGCYFR.[Y]                                                                                                                                                                                                                                                                                                                                                                  | FamD2 [47-60]      | 2         |
| [K].QPKLGCYFR.[Y]                                                                                                                                                                                                                                                                                                                                                                      | FamD2 [51-60]      | 7         |
| [K].LGCYFR.[Y]                                                                                                                                                                                                                                                                                                                                                                         | FamD2 [55-60]      | 16        |
| [R].YHEEDESQGLAWDIAR.[K]                                                                                                                                                                                                                                                                                                                                                               | FamD2 [61-77]      | 335       |
| [R].KSGLLSDQGRPVVDQLIPEICETFPIMADGVDFDVK.[H]                                                                                                                                                                                                                                                                                                                                           | FamD2 [78-112]     | 45        |
| [K].SGLLSQGRPVVDQLIPEICETFPIMADGVDFDVK.[H]                                                                                                                                                                                                                                                                                                                                             | FamD2 [79-112]     | 28        |
| [K].IWQSIK.[G]                                                                                                                                                                                                                                                                                                                                                                         | FamD2 [118-123]    | 12        |
| [K].GVVPVQDAFK.[L]                                                                                                                                                                                                                                                                                                                                                                     | FamD2 [124-133]    | 22        |
| [K].LSLPASVTTHSDFLK.[N]                                                                                                                                                                                                                                                                                                                                                                | FamD2 [134-148]    | 42        |
| [K].HHTSEYYK.[N]                                                                                                                                                                                                                                                                                                                                                                       | FamD2 [178-185]    | 1         |
| [R].LCFYLPFLNR.[E]                                                                                                                                                                                                                                                                                                                                                                     | FamD2 [224-233]    | 5         |
| [R].EAVPQNLLNPLLK.[K]                                                                                                                                                                                                                                                                                                                                                                  | FamD2 [234-246]    | 42        |
| [R].EAVPQNLLNPLLKK.[Y]                                                                                                                                                                                                                                                                                                                                                                 | FamD2 [234-247]    | 14        |
| [K].KYINEAPALVDNPGFILGWSFGPQGK.[G]                                                                                                                                                                                                                                                                                                                                                     | FamD2 [247-273]    | 10        |
| [K].YINEAPALVDNPGFILGWSFGPQGGK.[G]                                                                                                                                                                                                                                                                                                                                                     | FamD2 [248-273]    | 16        |
| [K].VDVDYHGR.[T]                                                                                                                                                                                                                                                                                                                                                                       | FamD2 [279-286]    | 3         |
| [R].TVPLFMK.[V]                                                                                                                                                                                                                                                                                                                                                                        | FamD2 [287-293]    | 64        |
| [R].TVPLFMKVHSQPLPK.[A]                                                                                                                                                                                                                                                                                                                                                                | FamD2 [287-301]    | 1         |
| [K].VHSQPLPK.[A]                                                                                                                                                                                                                                                                                                                                                                       | FamD2 [294-301]    | 6         |
| <p>FamD2<br/> MNDVNRIRTDIINVAKTFGAEYSEKVLDEVFQVFGEQFADNSFMIRTSN<br/> KQPKLGCYFRYHEEDESQGLAWDIARKSGLLSQGRPVVDQLIPEICE<br/> TFPIMADGVDFDVKHGLAKIWQSIKGVVPVQDAFKLSLPASVTTHSDF<br/> LKNHHLDALYAFGIDYHHSSVNLDFDYHPKHHTSEYYKNLLQDLQF<br/> QPPSDELLELLTNGEIALTFNFASPRIERLCFYLPFLNREAVPQNLLNPL<br/> LKKYINEAPALVDNPGFILGWSFGPQGGKGTYYTKVDVDYHGRTVPLF<br/> MKVHSQPLPKAADFALAQ, 309 residues</p> |                    |           |

**Table S3: NMR characterization of 5-fluoro-12-*epi*-hapalindole U (15)**[ $\alpha$ ]<sub>D</sub><sup>25</sup>=+7.7 (c=0.07, CH<sub>2</sub>Cl<sub>2</sub>)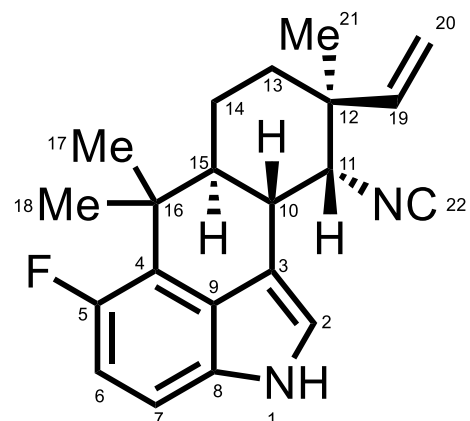

| Position | <sup>13</sup> C shift (ppm)<br>(Fluorine coupling) C <sub>6</sub> D <sub>6</sub> | <sup>1</sup> H shift (ppm),<br>multi (J) C <sub>6</sub> D <sub>6</sub> | COSY  | HMBC                 |
|----------|----------------------------------------------------------------------------------|------------------------------------------------------------------------|-------|----------------------|
| 1        |                                                                                  | 6.55, bs                                                               | 2     |                      |
| 2        | 118.03                                                                           | 6.35, s                                                                | 1     | 3, 4, 8, 9           |
| 3        | 113.75                                                                           |                                                                        |       |                      |
| 4        | 124.13, d, (13.1)                                                                |                                                                        |       |                      |
| 5        | 154.29, d, (236.7)                                                               |                                                                        |       |                      |
| 6        | 112.75, d, (29.2)                                                                | 7.01, dd, (12.9, 4.4)                                                  | 6     | 4,5,8                |
| 7        | 109.71, d, (10.1)                                                                | 6.69, dd, (3.0, 8.7)                                                   | 7     | 4,5,9                |
| 8        | 130.96                                                                           |                                                                        |       |                      |
| 9        | 127.08, d, (8.6)                                                                 |                                                                        |       |                      |
| 10       | 34.58                                                                            | 2.90, d, (11.5)                                                        | 15    |                      |
| 11       | 63.35                                                                            | 3.90, s                                                                | 10    | 10,12,13,15          |
| 12       | 39.73                                                                            |                                                                        |       |                      |
| 13       | 31.27                                                                            | 1.66, d, (3.7) & 1.44, m                                               | 14    | 12,14,15,21          |
| 14       | 21.17                                                                            | 1.48, d, (3.7) & 1.27, m                                               | 13,15 | 13, 15,21            |
| 15       | 43.98                                                                            | 1.98, td, (12.0, 3.4)                                                  | 10,14 | 10,11,13,14,16,17,18 |
| 16       | 37.27                                                                            |                                                                        |       |                      |
| 17       | 23.07                                                                            | 1.11, s                                                                | 18    | 9, 15, 16, 18        |
| 18       | 25.05                                                                            | 1.63, s                                                                | 17    | 9, 15, 16, 17        |
| 19       | 142.17                                                                           | 5.39, dd, (17.7, 11.0)                                                 | 20    | 11,12,13,21          |
| 20       | 114.47                                                                           | (cis) 4.91, d, (11.0)<br>(trans), 4.84, d, (17.7)                      | 19    | 12, 19,21            |
| 21       | 28.35                                                                            | 1.18, s                                                                |       | 11, 12, 13, 19       |
| 22       | 160.84                                                                           |                                                                        |       |                      |

**Table S4: NMR characterization of 6-fluoro-12-*epi*-hapalindole U (16)**[ $\alpha$ ]<sub>D</sub><sup>25</sup>=+12.9 (c=0.04, CH<sub>2</sub>Cl<sub>2</sub>)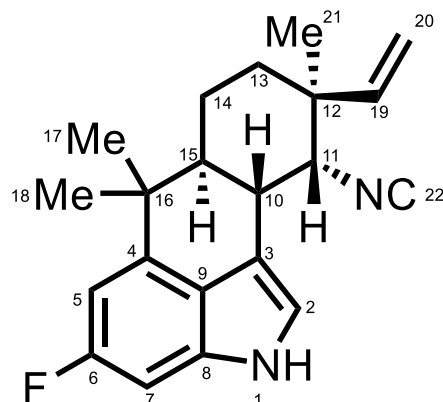

| Position | <sup>13</sup> C shift (ppm)<br>(Fluorine coupling) C <sub>6</sub> D <sub>6</sub> | <sup>1</sup> H shift (ppm),<br>multi (J) C <sub>6</sub> D <sub>6</sub> | COSY  | HMBC              |
|----------|----------------------------------------------------------------------------------|------------------------------------------------------------------------|-------|-------------------|
| 1        |                                                                                  | 6.51, bs                                                               |       |                   |
| 2        | 116.62, d, (3.2)                                                                 | 6.29, s                                                                |       | 3, 8, 9           |
| 3        | 113.12                                                                           |                                                                        |       |                   |
| 4        | 142.37, d, (8.7)                                                                 |                                                                        |       |                   |
| 5        | 102.96, d, (25.9)                                                                | 6.93, dd, (11.0, 1.8)                                                  |       | 6,7,9             |
| 6        | 162.10, d, (236.5)                                                               |                                                                        |       |                   |
| 7        | 95.36, d, (27.4)                                                                 | 6.69, d, (9.8)                                                         |       | 5,6,9             |
| 8        | 134.02                                                                           |                                                                        |       |                   |
| 9        | 122.36                                                                           |                                                                        |       |                   |
| 10       | 34.88                                                                            | 2.95, d, (11.5)                                                        | 15    | 3,15              |
| 11       | 63.45                                                                            | 3.88, s                                                                | 10    | 10,12,13,15       |
| 12       | 39.81                                                                            |                                                                        |       |                   |
| 13       | 31.08                                                                            | 1.66, m & 1.43, m                                                      | 14    | 11,15             |
| 14       | 21.66                                                                            | 1.41, d, (3.7) & 1.26, m                                               | 13,15 | 19                |
| 15       | 43.57                                                                            | 1.93, td, (11.9, 3.5)                                                  | 10,14 |                   |
| 16       | 37.44                                                                            |                                                                        |       |                   |
| 17       | 24.26                                                                            | 1.14, s                                                                | 18    | 4, 15, 16, 18     |
| 18       | 24.96                                                                            | 0.89, s                                                                | 17    | 4, 15, 16, 17, 19 |
| 19       | 142.55                                                                           | 5.40, dd, (17.7, 11.0)                                                 | 20    | 11, 12, 13        |
| 20       | 114.49                                                                           | (cis) 4.92, d, (11.0)<br>(trans), 4.85, d, (17.7)                      | 19    | 12,19             |
| 21       | 28.27                                                                            | 1.17, s                                                                |       | 11, 12, 13, 19    |
| 22       | 160.88                                                                           |                                                                        |       |                   |

**Table S5: NMR characterization of 5-fluoro-12-*epi*-fischerindole U (17)**

$[\alpha]_{D}^{25} = +12.0$  (c=0.15, CH<sub>2</sub>Cl<sub>2</sub>)

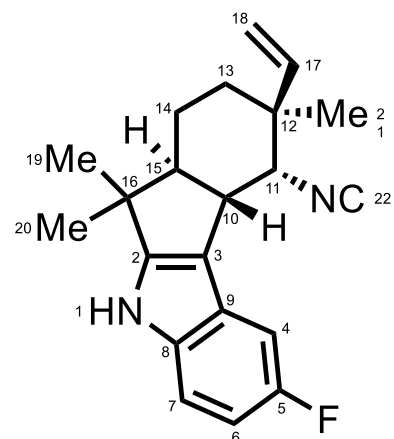

| Position | <sup>13</sup> C shift (ppm)<br>(Fluorine<br>coupling) C <sub>6</sub> D <sub>6</sub> | <sup>1</sup> H shift (ppm),<br>multi (J) C <sub>6</sub> D <sub>6</sub> | COSY   | HMBC             |
|----------|-------------------------------------------------------------------------------------|------------------------------------------------------------------------|--------|------------------|
| 1        |                                                                                     | 6.43, bs                                                               |        | 2,3,8,9          |
| 2        | 153.90                                                                              |                                                                        |        |                  |
| 3        | 115.16                                                                              |                                                                        |        |                  |
| 4        | 103.93, d, (23.1)                                                                   | 7.27, dd (9.4,2.5)                                                     | 6      | 3,5,6,8          |
| 5        | 159.42, d, (233.5)                                                                  |                                                                        |        |                  |
| 6        | 109.07, d, (26.3)                                                                   | 6.99, td, (9.0, 2.6)                                                   | 7      | 4,5,8            |
| 7        | 112.55, d, (10.1)                                                                   | 6.81, dd, (8.8, 4.4)                                                   | 6      | 4,5,9            |
| 8        | 136.53                                                                              |                                                                        |        |                  |
| 9        | 124.63, d, (10.1)                                                                   |                                                                        |        |                  |
| 10       | 42.37                                                                               | 2.88, m                                                                | 11,15  | 3,9,14,15        |
| 11       | 62.21                                                                               | 3.95, d (3.0)                                                          | 11     | 3,12,13,15,17,22 |
| 12       | 41.04                                                                               |                                                                        |        |                  |
| 13       | 31.82                                                                               | 1.55, m                                                                | 14     | 11,12,14,15,17   |
| 14       | 20.81                                                                               | 1.34, ddd (13.1,<br>6.8, 4.0) & 1.23, m                                | 13,15  | 12,13,15         |
| 15       | 55.21                                                                               | 2.36, ddd (13.3,<br>10.6, 3.3)                                         | 10, 14 | 10,14,16,19      |
| 16       | 40.18                                                                               |                                                                        |        |                  |
| 17       | 143.02                                                                              | 5.31, dd (17.6,<br>11.0)                                               | 18     | 11,13,12,21      |
| 18       | 114.16                                                                              | (cis) 4.87, d (11.1)<br>(trans) 4.84, d<br>(17.7)                      | 17     | 12,17,21         |
| 19       | 24.93                                                                               | 1.01, s                                                                |        | 2,15,16,20       |
| 20       | 20.78                                                                               | 0.74, s                                                                |        | 2,15,16,19       |
| 21       | 28.15                                                                               | 1.13, s                                                                |        | 11,12,13,17      |
| 22       | 161.39                                                                              |                                                                        |        |                  |

**Table S6: NMR characterization 6-Fluoro-12-*epi*-Fischerindole U (18)** $[\alpha]_D^{25} = +10.8$  (c=0.16, CH<sub>2</sub>Cl<sub>2</sub>)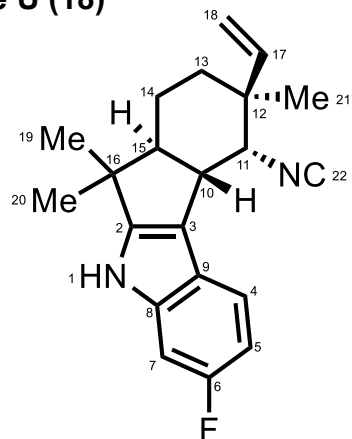

| Position | <sup>13</sup> C shift (ppm),<br>(Fluorine<br>coupling) C <sub>6</sub> D <sub>6</sub> | <sup>1</sup> H shift (ppm),<br>multi (J) C <sub>6</sub> D <sub>6</sub> | COSY   | HMBC           |
|----------|--------------------------------------------------------------------------------------|------------------------------------------------------------------------|--------|----------------|
| 1        |                                                                                      | 6.38, bs                                                               |        |                |
| 2        | 152.16, d, (3.5)                                                                     |                                                                        |        |                |
| 3        | 114.88                                                                               |                                                                        |        |                |
| 4        | 119.18, d, (10.1)                                                                    | 7.20, dd, (8.6, 5.3)                                                   | 5      | 3,8,9          |
| 5        | 108.67, d, (24.2)                                                                    | 6.99, td, (9.1, 2.4)                                                   | 4      | 6,7,9          |
| 6        | 159.78, d, (235.6)                                                                   |                                                                        |        |                |
| 7        | 98.80, d, (25.9)                                                                     | 6.85, dd, (9.8, 2.3)                                                   |        | 5,6,8,9        |
| 8        | 139.95, d, (12.0)                                                                    |                                                                        |        |                |
| 9        | 121.08                                                                               |                                                                        |        |                |
| 10       | 42.51                                                                                | 2.89, m                                                                | 11, 15 | 15             |
| 11       | 62.44                                                                                | 4.03, s                                                                | 10     | 10,12,13,15,22 |
| 12       | 41.03                                                                                |                                                                        |        |                |
| 13       | 31.87                                                                                | 1.56, m                                                                | 14     | 11,12,14,15,21 |
| 14       | 20.82                                                                                | 1.35, m & 1.24, m                                                      | 13     | 10,13,15       |
| 15       | 55.21                                                                                | 2.36, ddd, (13.4,<br>10.6, 3.2)                                        | 10, 14 | 14,19          |
| 16       | 40.25                                                                                |                                                                        |        |                |
| 17       | 143.08                                                                               | 5.34, dd, (17.5,<br>11.0)                                              | 18     | 11,12,13       |
| 18       | 114.16                                                                               | Cis 4.89, d, (11.0)<br>Trans 4.87, d,<br>(17.5)                        | 17     | 12,17          |
| 19       | 25.07                                                                                | 1.02, s                                                                | 20     | 2,15,16,20     |
| 20       | 20.70                                                                                | 0.74, s                                                                | 19     | 2,15,16,19     |
| 21       | 28.17                                                                                | 1.15, s                                                                |        | 11,12,13,17    |
| 22       | 161.26                                                                               |                                                                        |        |                |

**Table S7: Amino acid sequences of cyclases  
Protein Sequences**

**FamC1**

MKRKLVAVVFLIFICLGINTPAHATSAVSIPIINNAGFENPFMDVVDDYTIDTPPGWTTYDPNNLVPEKRTT  
WTSNNGVGYVGPQTQFYNQLAPEGRNIGYIYLSQNP GSGVAGFEQILDATLEPDTKYTLTVDVGNLAGTF  
KGLSFAGFPGYRVELLAGDTVLAADHNNLFIKEGEFKTSTVITYTSTAKDLHLGQKLGIRLVNLLQDKFSGL  
DFDNVRLTTEPTET

**FamC2**

MKRNLVAAIVLLIYICSGINTPANA AVTTSIPIKNPGFEEPILKVEGDYDIDAPPGWTTYNPNGLIPEKRTKW  
TSNNGVGHVGPNYGQLFYNQQLPEGKNIGFVYLAQKTGSGIAGFEQTLDAVLEPNTSYKLIVDIGNFGGMF  
KGVSFAGFPGYRVELLAGDTVLAADHNNLYIKDGEFKTSTVITFTSAANNPYLGQKLGIRLINLLQDKFSGL  
DFDNVRLITETVDT

**FamC3**

MKLKSVAVVFLIFICLGINTPANATGAVSIPIKNAGFEDPFLEVVDYTVNTPPGWSTYDPNGLIPEQPTVQ  
TSYVGVNTNATPSSAFYDQKVPEGRNMGSVYLAHEPGSGIAGLEQTLDTVLESNKNYLLVDIGNSADGYK  
DISLADFPGYRVELLAGDKVIAVDHNSVYIKEGEFKTSMIKFTAKPDSPYLGQKLGIRLINSLQTLSGNIDFD  
NVRLSVESAVI

**FisC**

MKRNFIIAAIVLLVYICFGISISANAASAVSIPIKNAGFEEPSLTVEDYTYTIDTPPGWITYDPNGLVPAKRTRIT  
SNNGVGYTGPN S AYYNHKAPEGRNVAVVYLAQEIGSGIAGLEQTLDAVLKPNTKYTLTVDIGNSGGSFQG  
FPLDGFPGYRVELLAGDTVLAADQN NLYIKEKDFKTTT VTFIATPESPYLGQHLGIRLINPLQKFGSGVDFD  
NVRLTAEP AET

**FimC5**

MKRNFIIAAIVLLVYIFSGINVFANAASAVCIPIKNAGFEEPILQIEDDYTIDTPPGWITYDPGGLVPAKRTRIT  
SNNGVGYTGSNSEFYNHKAPEGRNVAVVYLAQEIGSGIAGLEQTLDAVLKPNTKYTLTVDIGNSGGSFQK  
TLDGFPGYRIELLAGDTVLAADHNTLYIKEKDFKSTTVTFTATPESPYLGQHLGIRLINPLQKFGSGVDFD  
VRLTAEP AET
